# Supplementary material for: Synthesis of 5H-chromeno[3,4-b]pyridinesviaDABCO-catalyzed [3 + 3] annulation of 3-nitro-2H-chromenes and allenoates
Source: Royal Society of Chemistry journal article supplement (doi:10.1039/d1ob01130h), 2021-01-01
Supplement: d1ob01130h1.pdf [file d1ob01130h1.pdf]

**Synthesis of 5*H*-chromeno[3,4-*b*]pyridines via DABCO-catalyzed [3+3] annulation  
of 3-nitro-2*H*-chromenes and allenates**

Maria I. L. Soares,<sup>a,\*</sup> Clara S. B. Gomes,<sup>b,c</sup> M. Conceição Oliveira,<sup>d</sup> Joaquim Marçalo,<sup>e</sup>  
Teresa M. V. D. Pinho e Melo<sup>a,\*</sup>

<sup>a</sup>University of Coimbra, Coimbra Chemistry Centre (CQC) and Department of Chemistry, 3004-535 Coimbra, Portugal

<sup>b</sup>LAQV-REQUIMTE, Departamento de Química, Faculdade de Ciências e Tecnologia, Universidade NOVA de Lisboa, 2829-516 Caparica, Portugal

<sup>c</sup>UCIBIO-REQUIMTE, Departamento de Química, Faculdade de Ciências e Tecnologia, Universidade NOVA de Lisboa, 2829-516 Caparica, Portugal

<sup>d</sup>Centro de Química Estrutural (CQE), Instituto Superior Técnico, Universidade de Lisboa, Av. Rovisco Pais, 1049-001 Lisboa, Portugal

<sup>e</sup>Centro de Química Estrutural (CQE), Instituto Superior Técnico, Universidade de Lisboa, 2695-066 Bobadela LRS, Portugal

\*misoares@ci.uc.pt; tmelo@ci.uc.pt

**Electronic Supplementary Information**

## Table of Contents

|                                                                                                 |     |
|-------------------------------------------------------------------------------------------------|-----|
| Copies of $^1\text{H}$ , $^{13}\text{C}$ , $^{19}\text{F}$ and 2D NMR Spectra for New Compounds | S2  |
| Crystallographic Data for Compounds <b>3b</b> and <b>4</b>                                      | S20 |
| Study of the Reaction Mechanism via Mass Spectrometry Analysis                                  | S23 |

# Copies of $^1\text{H}$ , $^{13}\text{C}$ , $^{19}\text{F}$ RMN and 2D NMR Spectra for New Compounds

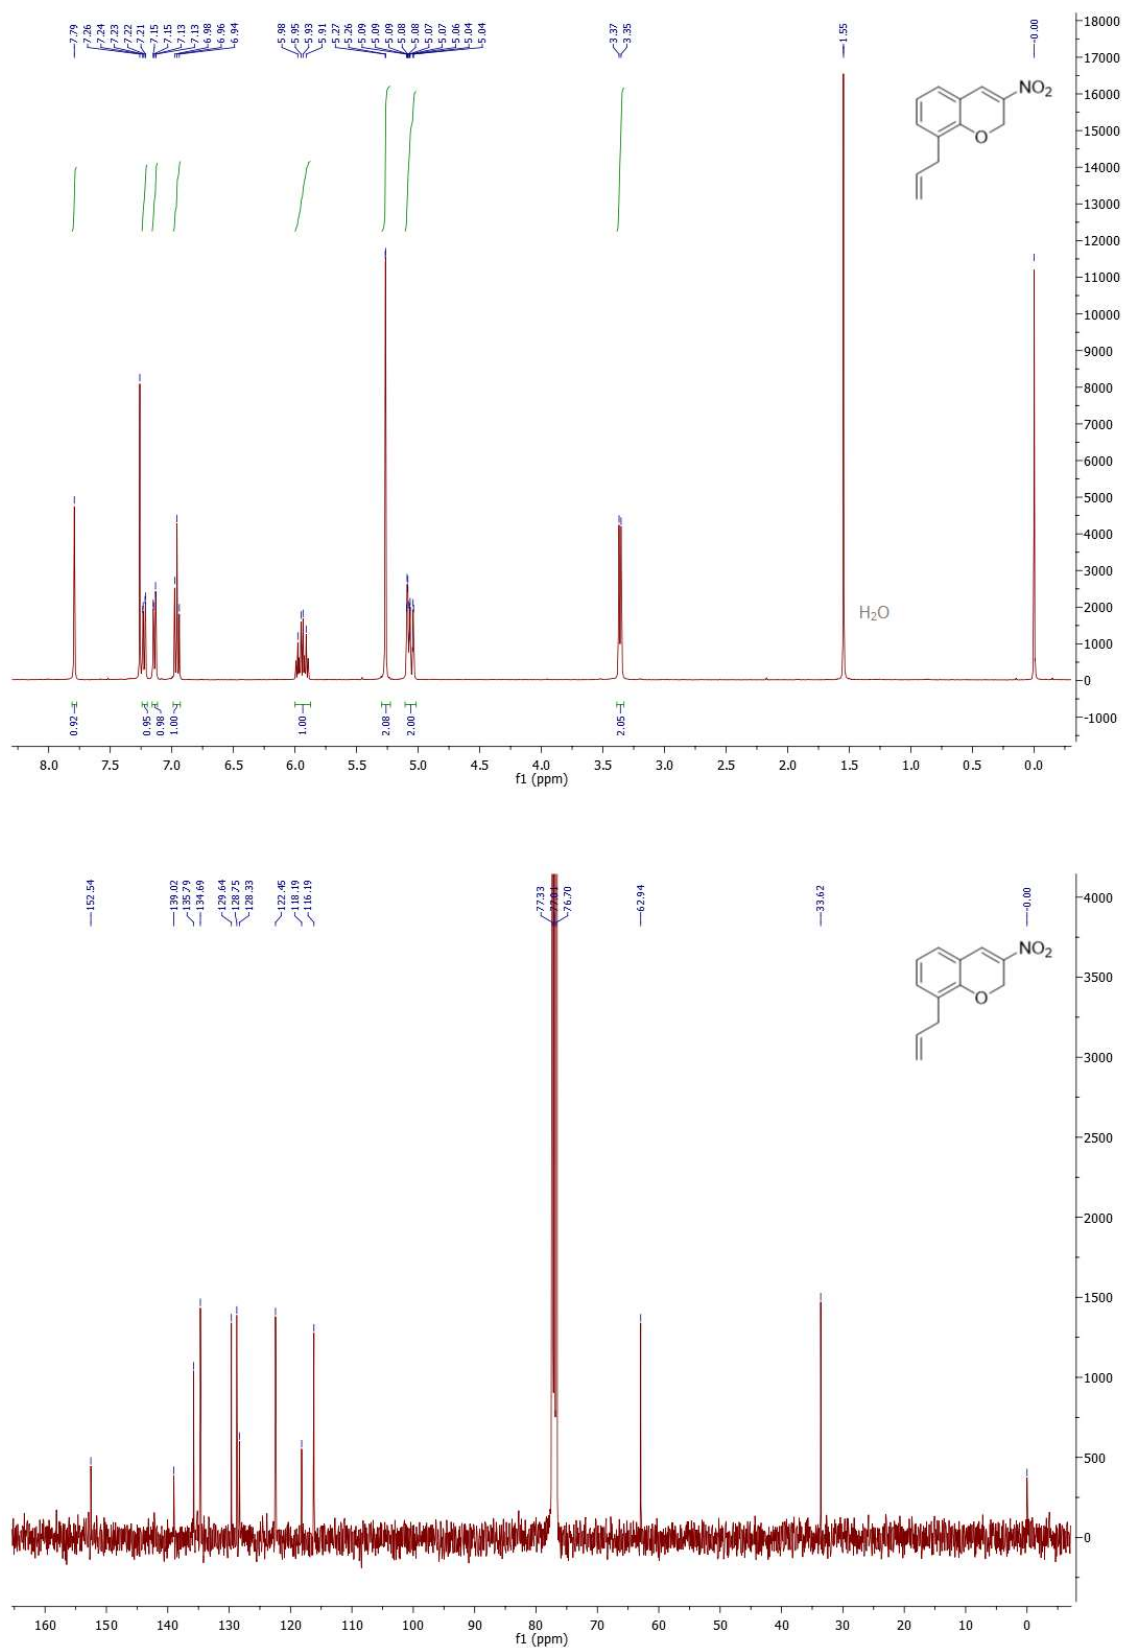

**Figure S1:**  $^1\text{H}$  and  $^{13}\text{C}$  NMR spectra of compound **1c** ( $\text{CDCl}_3$ ).

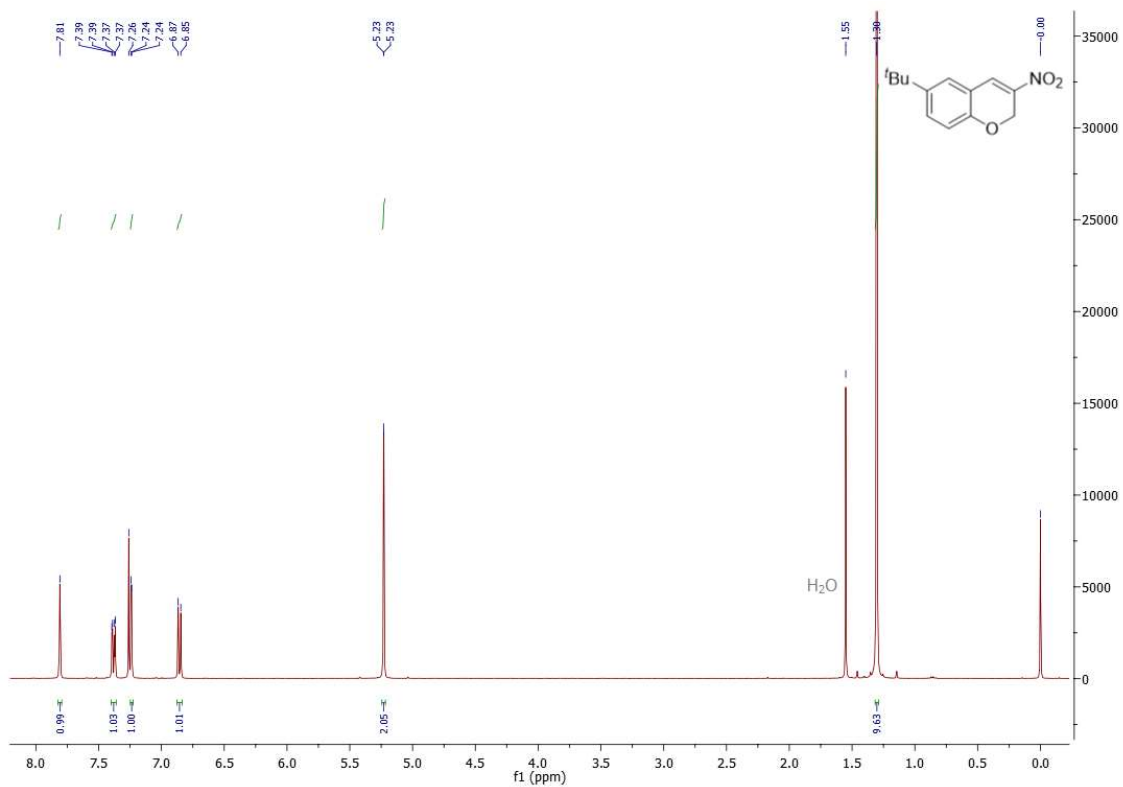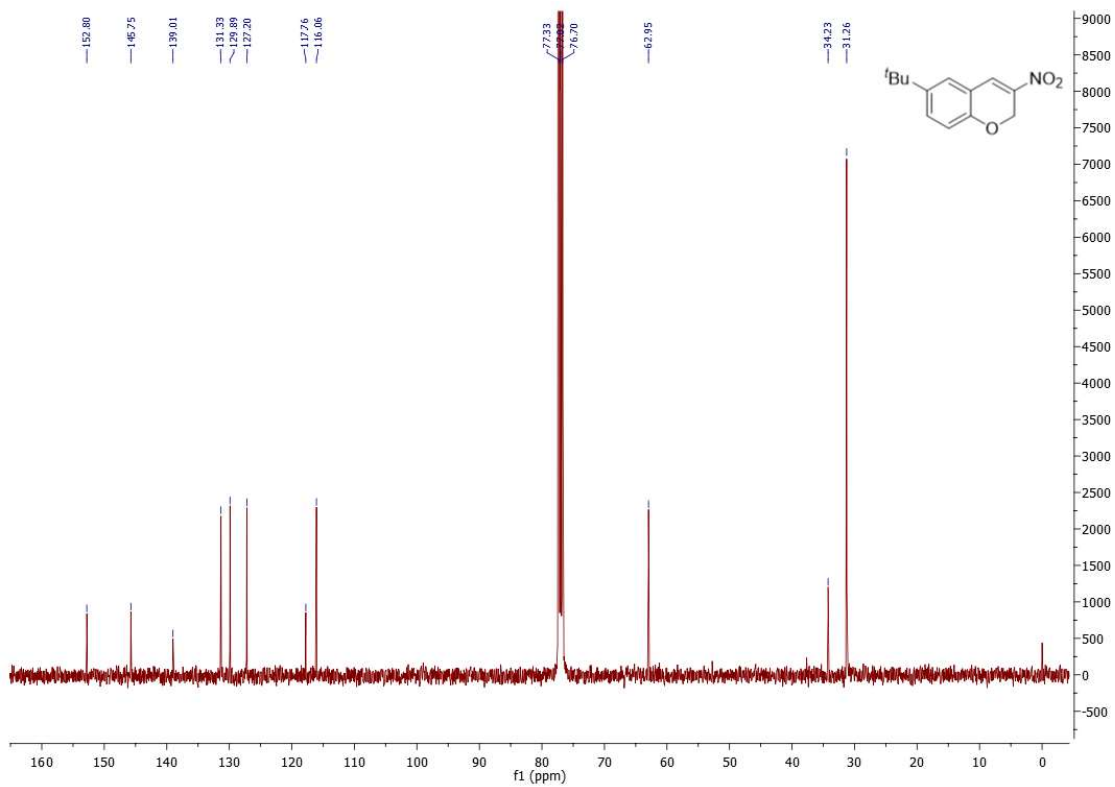

**Figure S2:** <sup>1</sup>H and <sup>13</sup>C NMR spectra of compound **1i** (CDCl<sub>3</sub>).

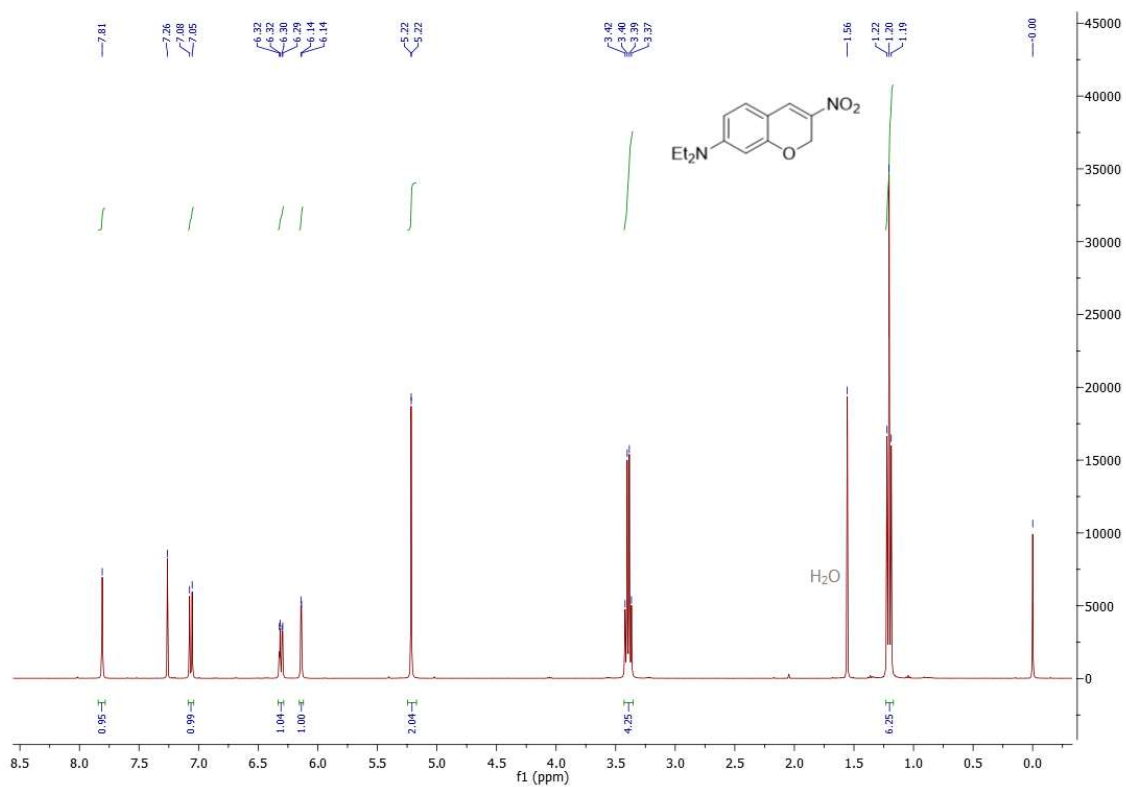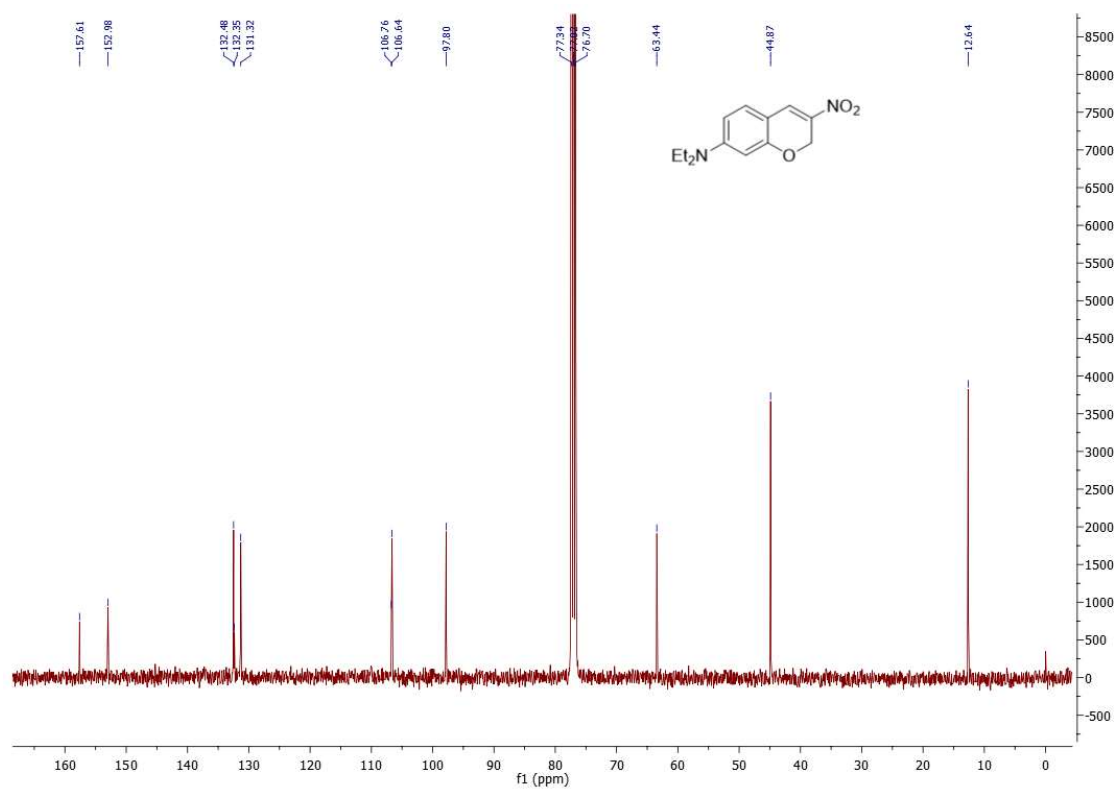

Figure S3:  $^1\text{H}$  and  $^{13}\text{C}$  NMR spectra of compound 1k ( $\text{CDCl}_3$ ).

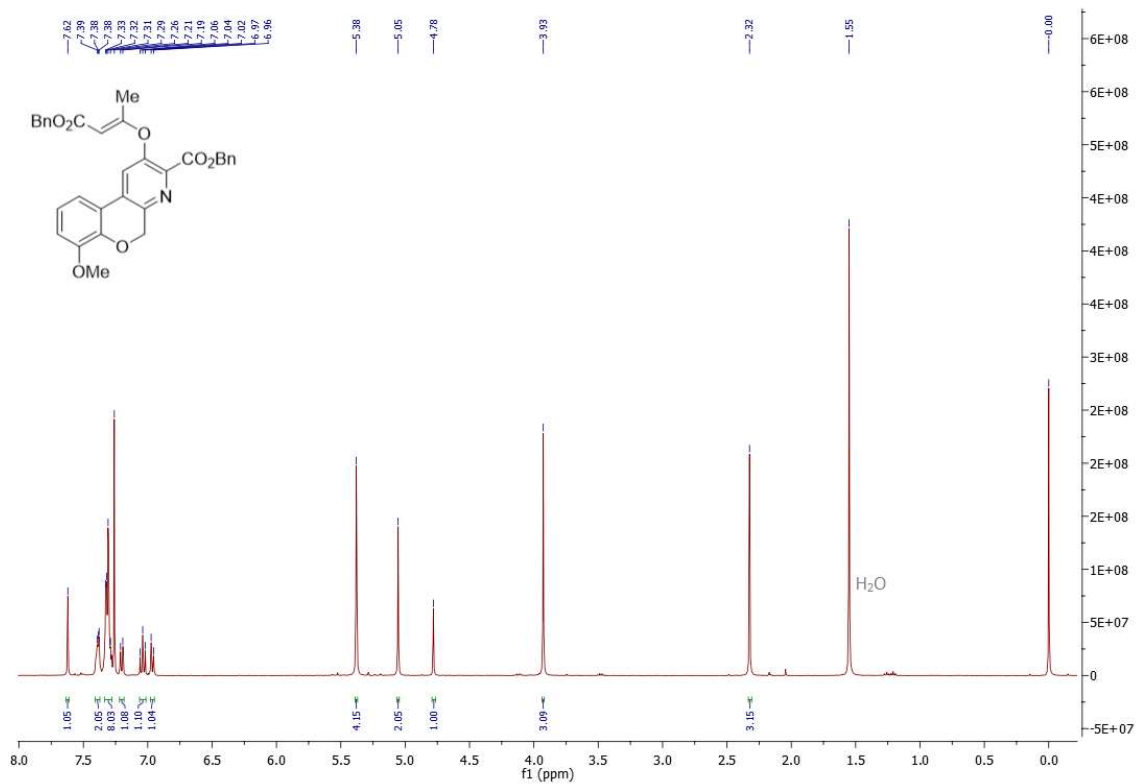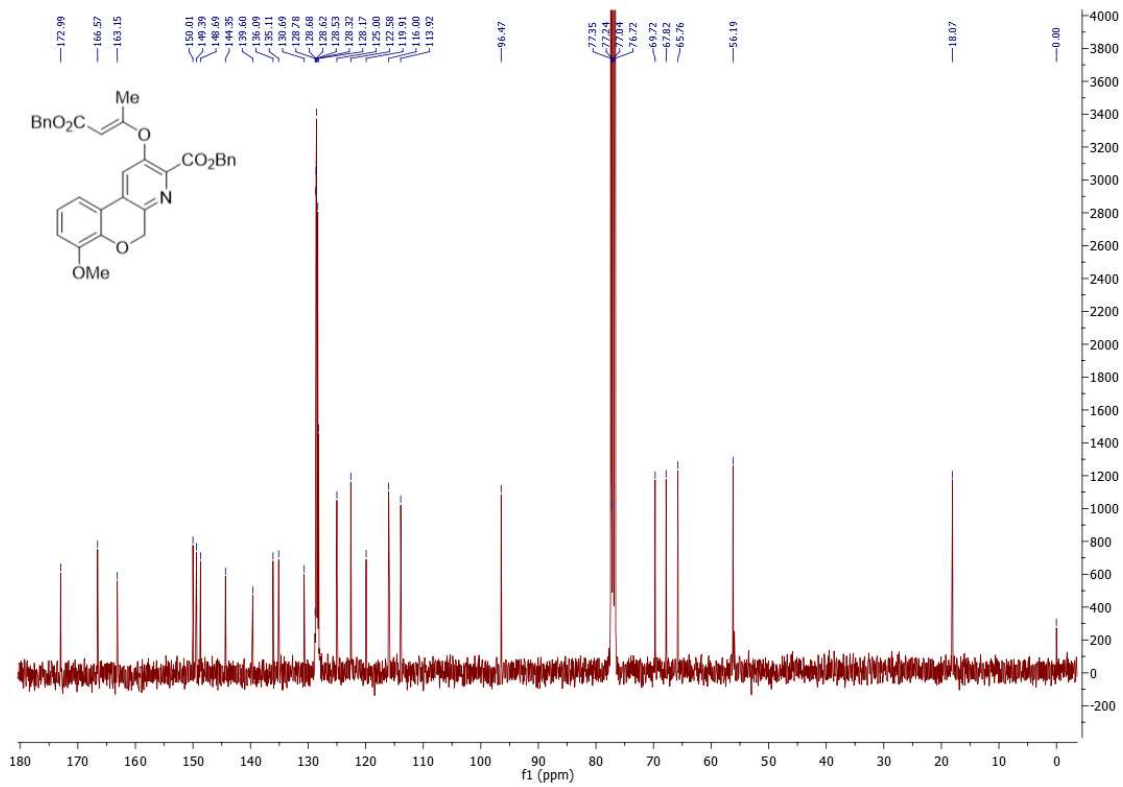

Figure S4: <sup>1</sup>H and <sup>13</sup>C NMR spectra of compound 3a (CDCl<sub>3</sub>).

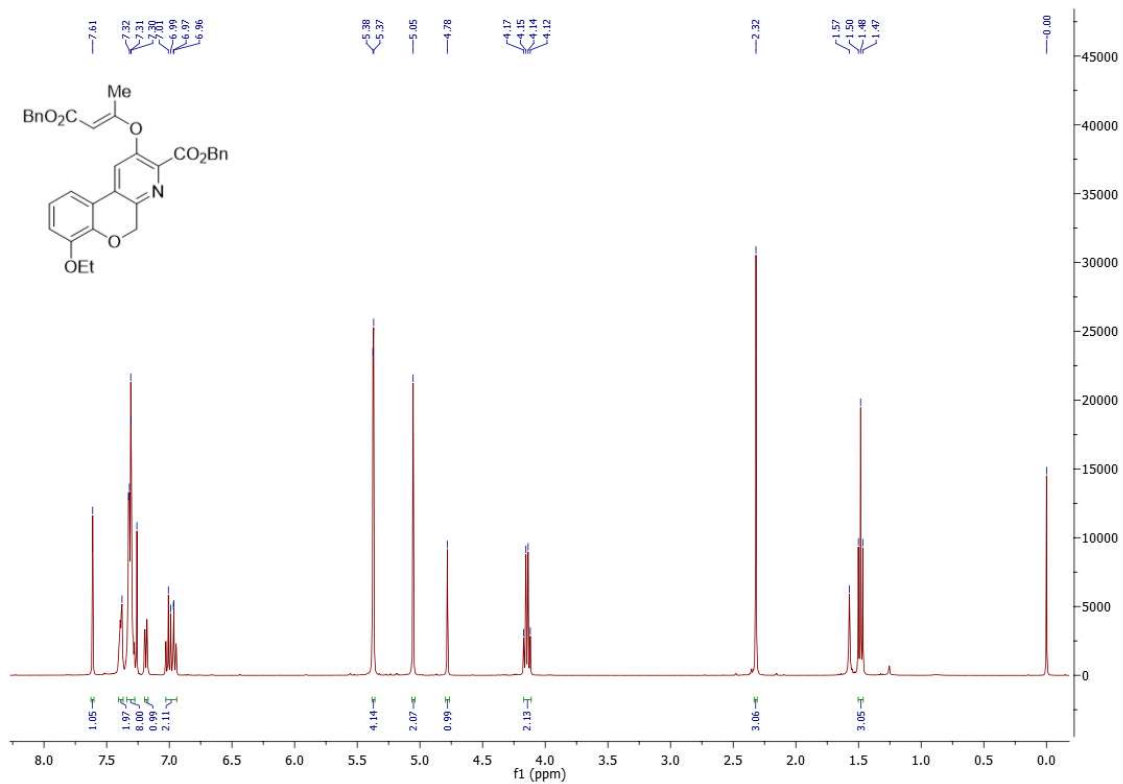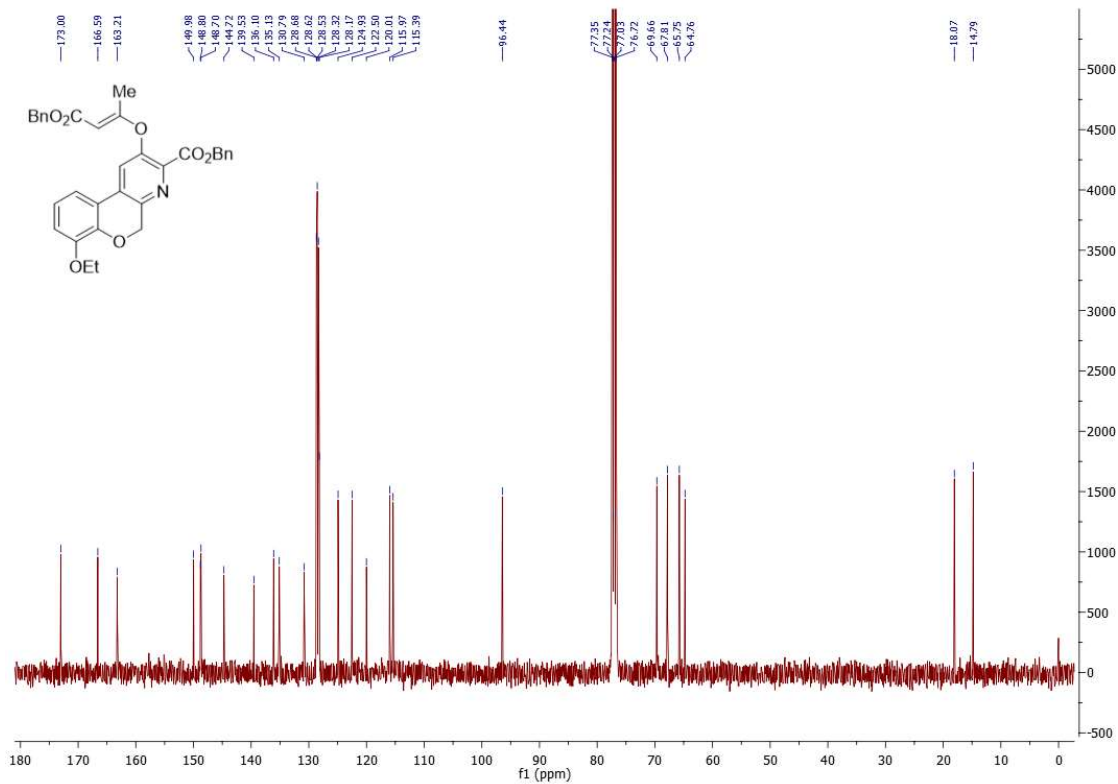

Figure S5:  $^1\text{H}$  and  $^{13}\text{C}$  NMR spectra of compound **3b** (CDCl<sub>3</sub>).

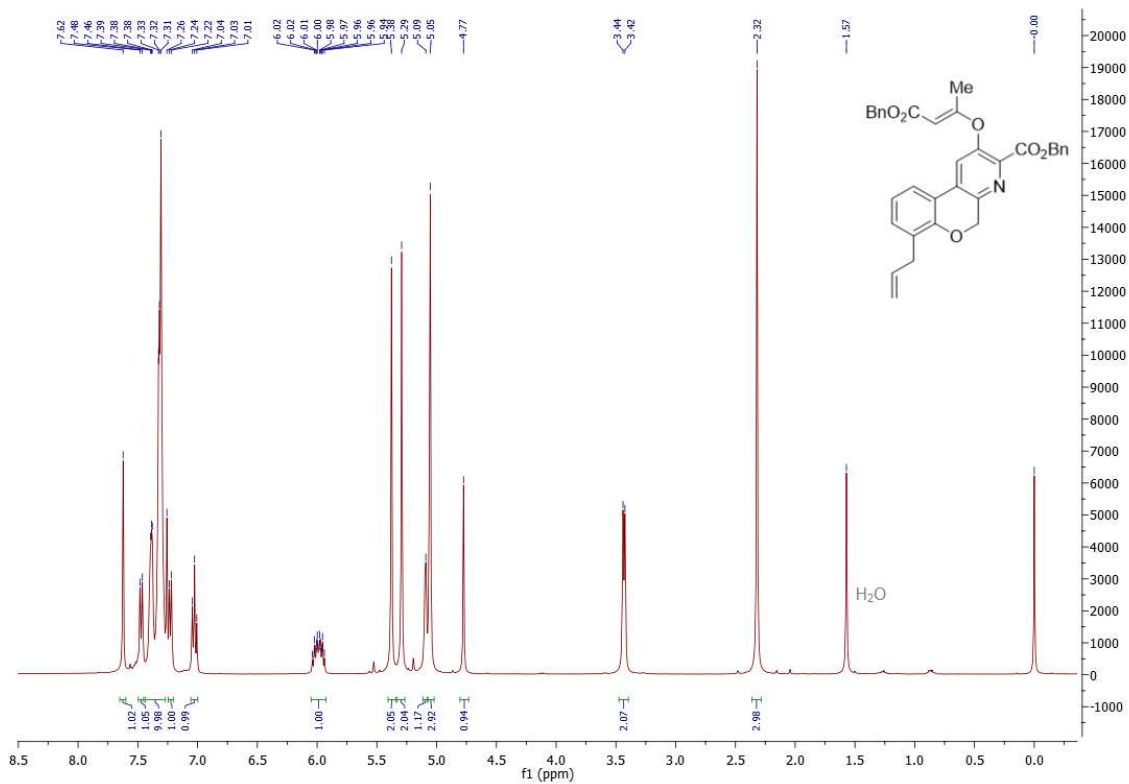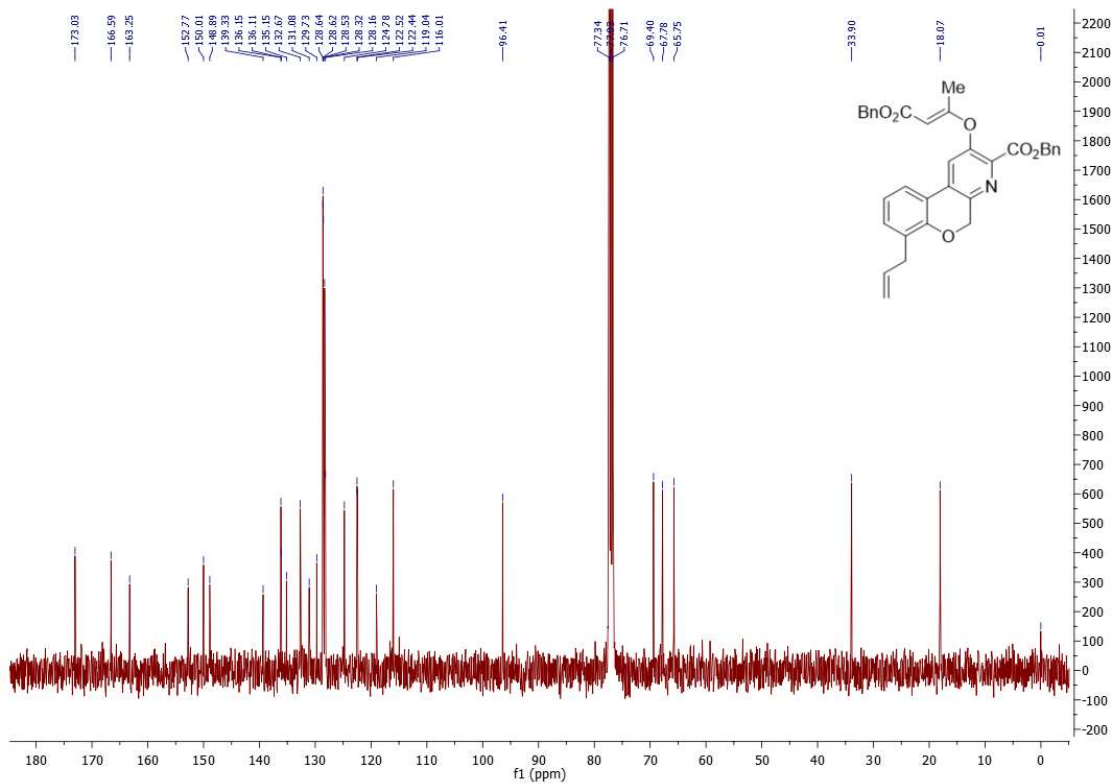

**Figure S6:** <sup>1</sup>H and <sup>13</sup>C NMR spectra of compound **3c** (CDCl<sub>3</sub>).



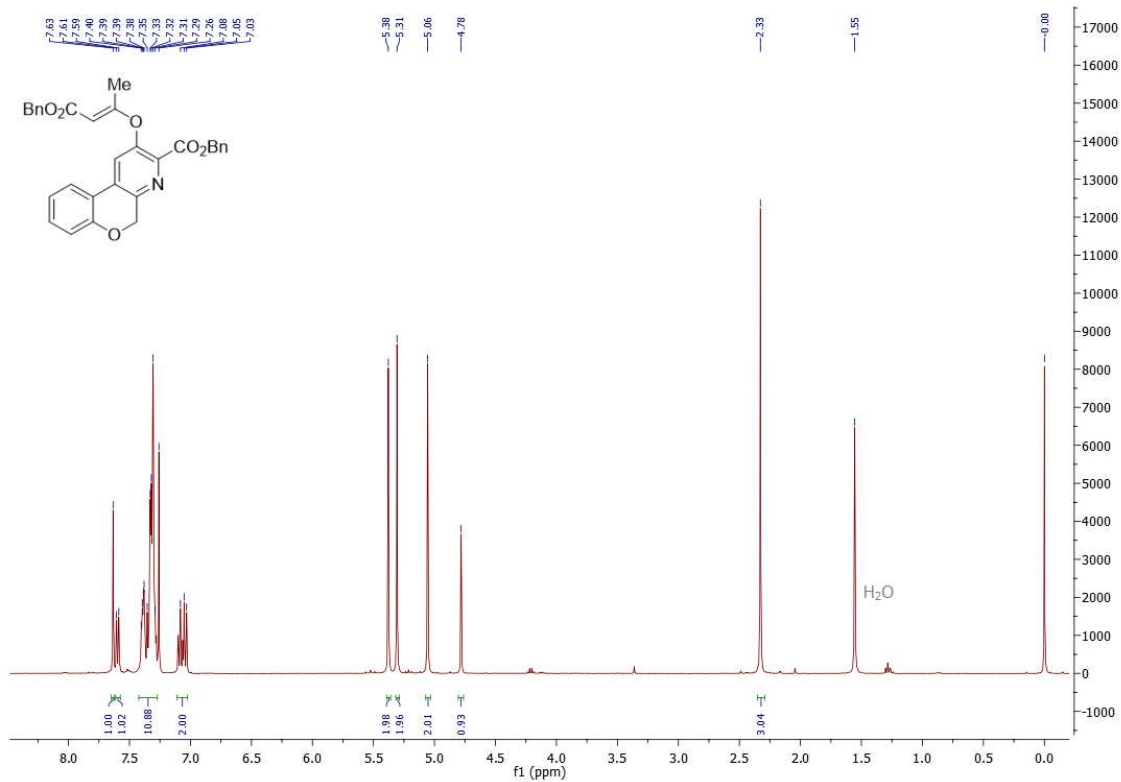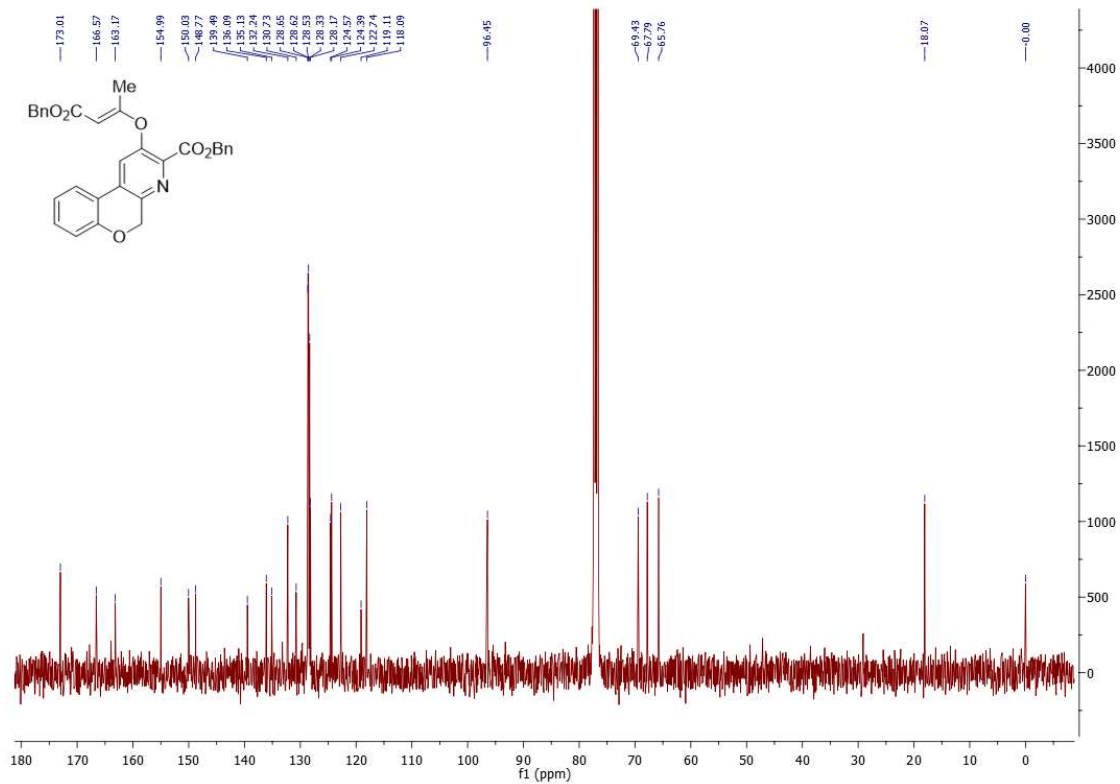

**Figure S7:** <sup>1</sup>H and <sup>13</sup>C NMR spectra of compound **3d** (CDCl<sub>3</sub>).

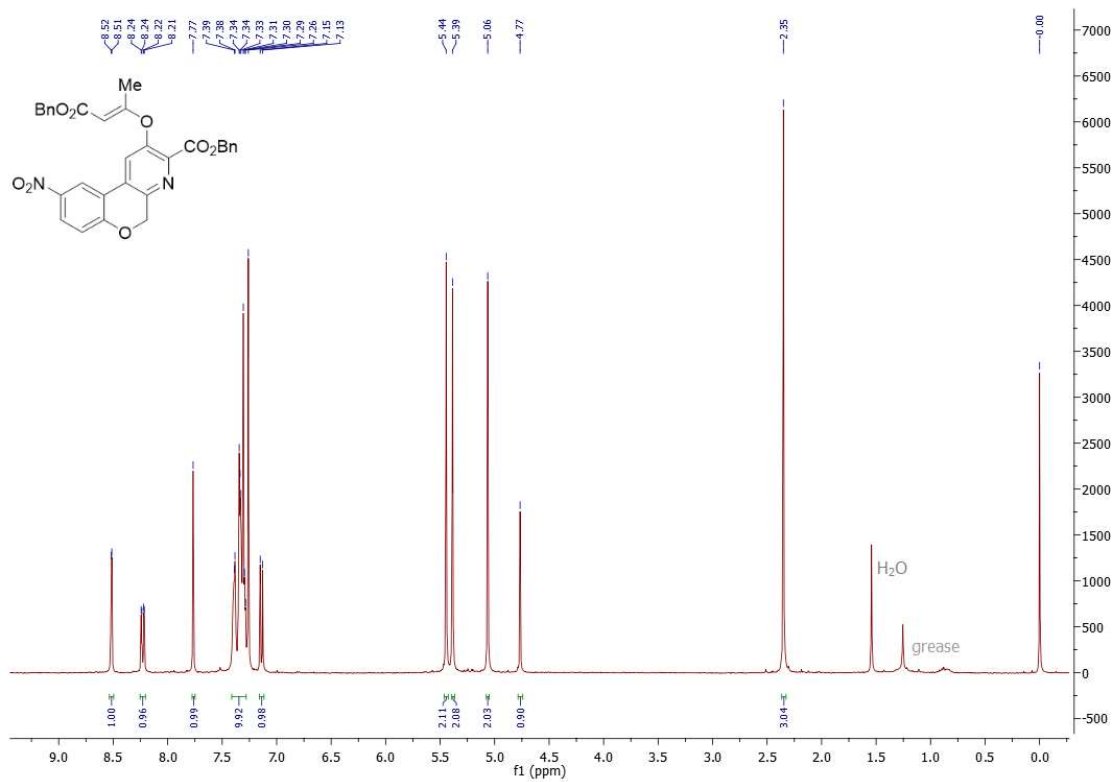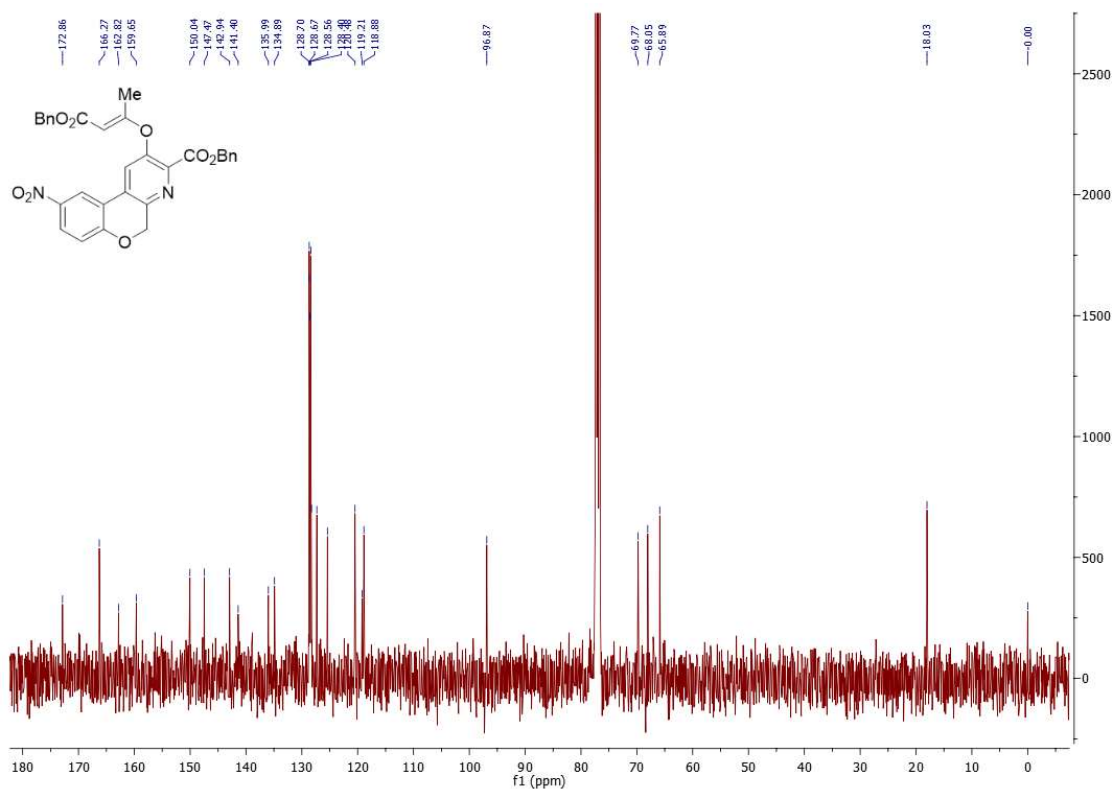

Figure S8: <sup>1</sup>H and <sup>13</sup>C NMR spectra of compound **3e** (CDCl<sub>3</sub>).

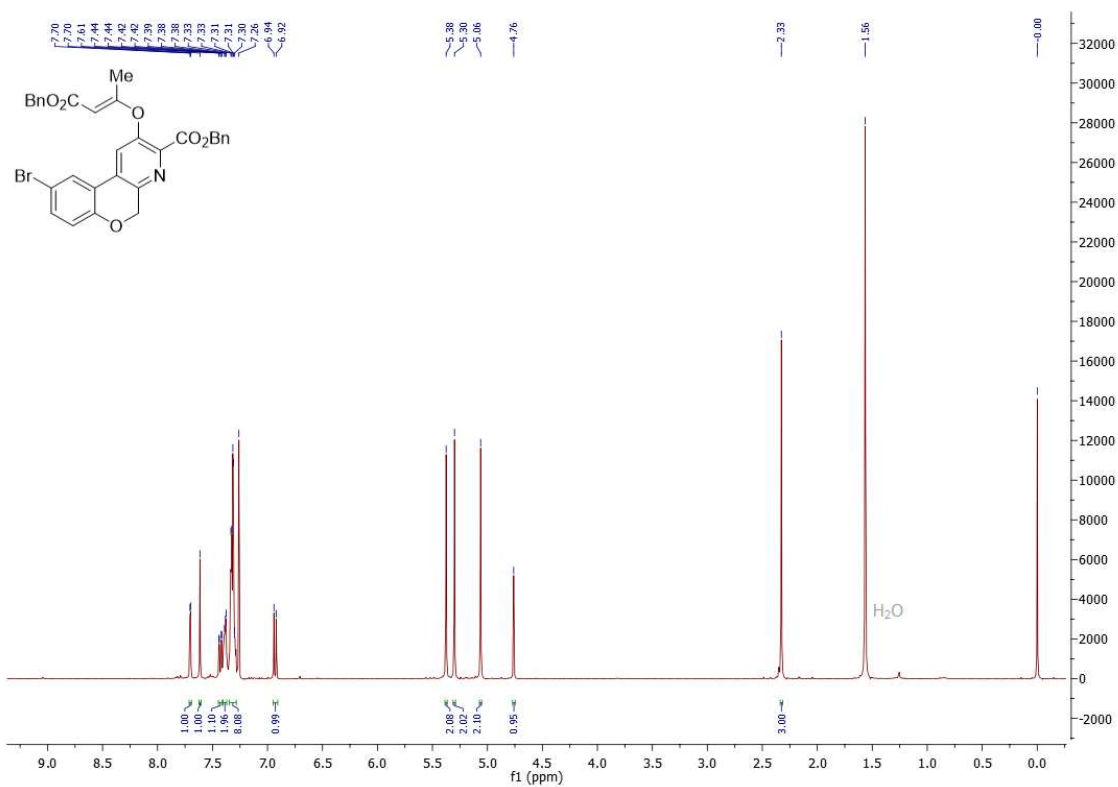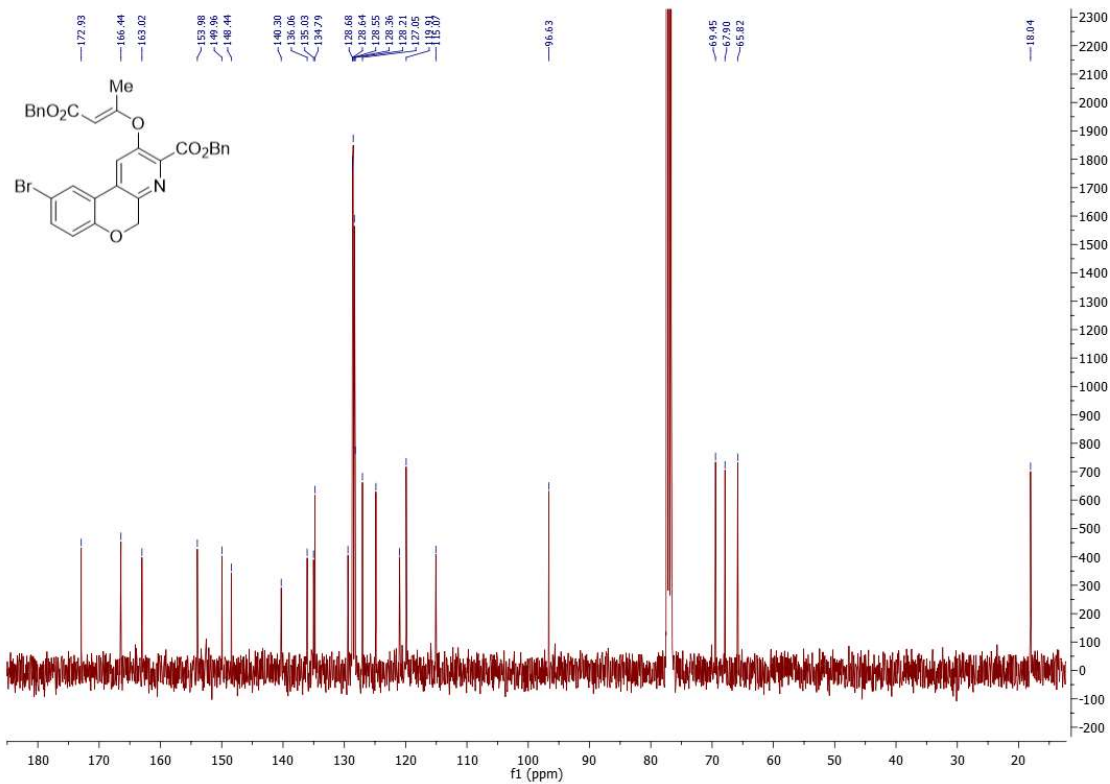

Figure S9: <sup>1</sup>H and <sup>13</sup>C NMR spectra of compound **3f** (CDCl<sub>3</sub>).

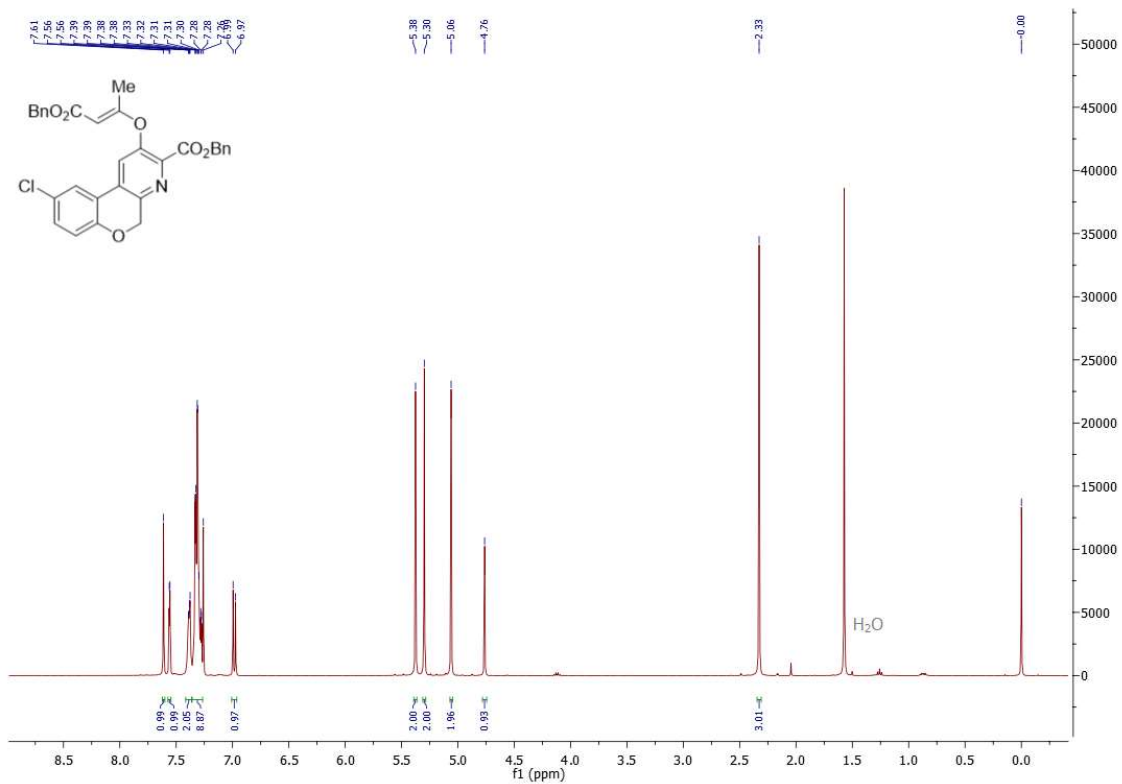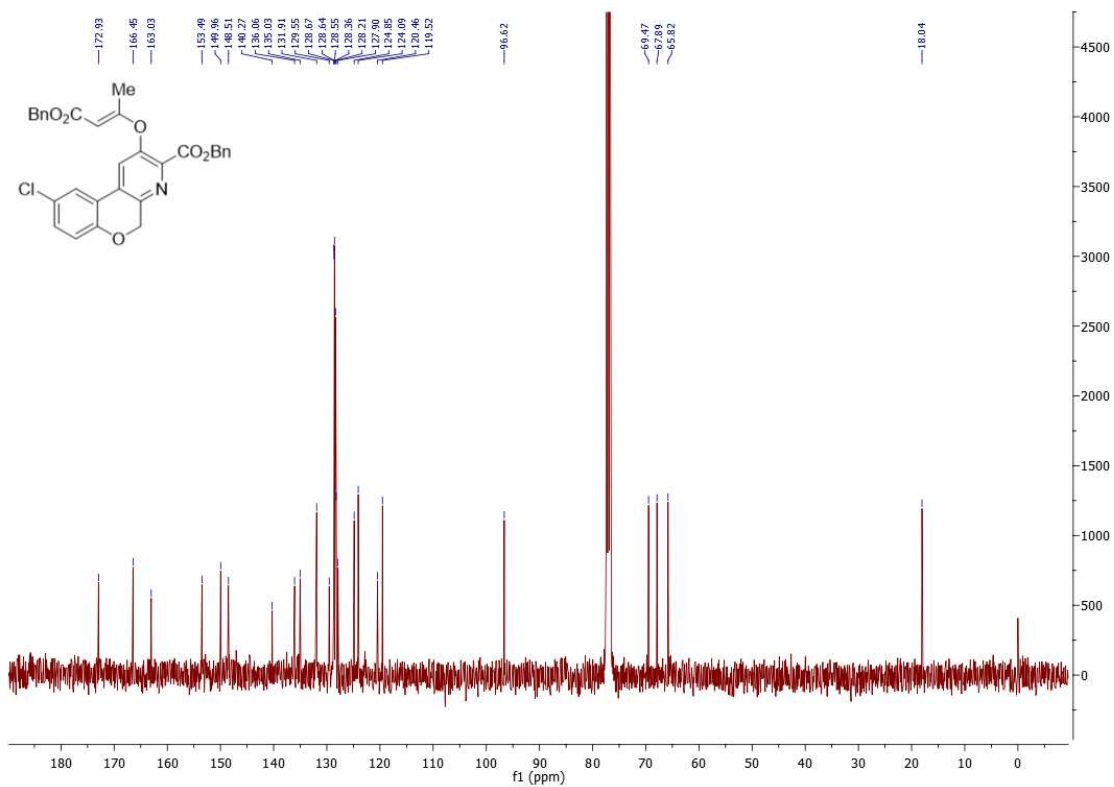

Figure S10: <sup>1</sup>H and <sup>13</sup>C NMR spectra of compound 3g (CDCl<sub>3</sub>).

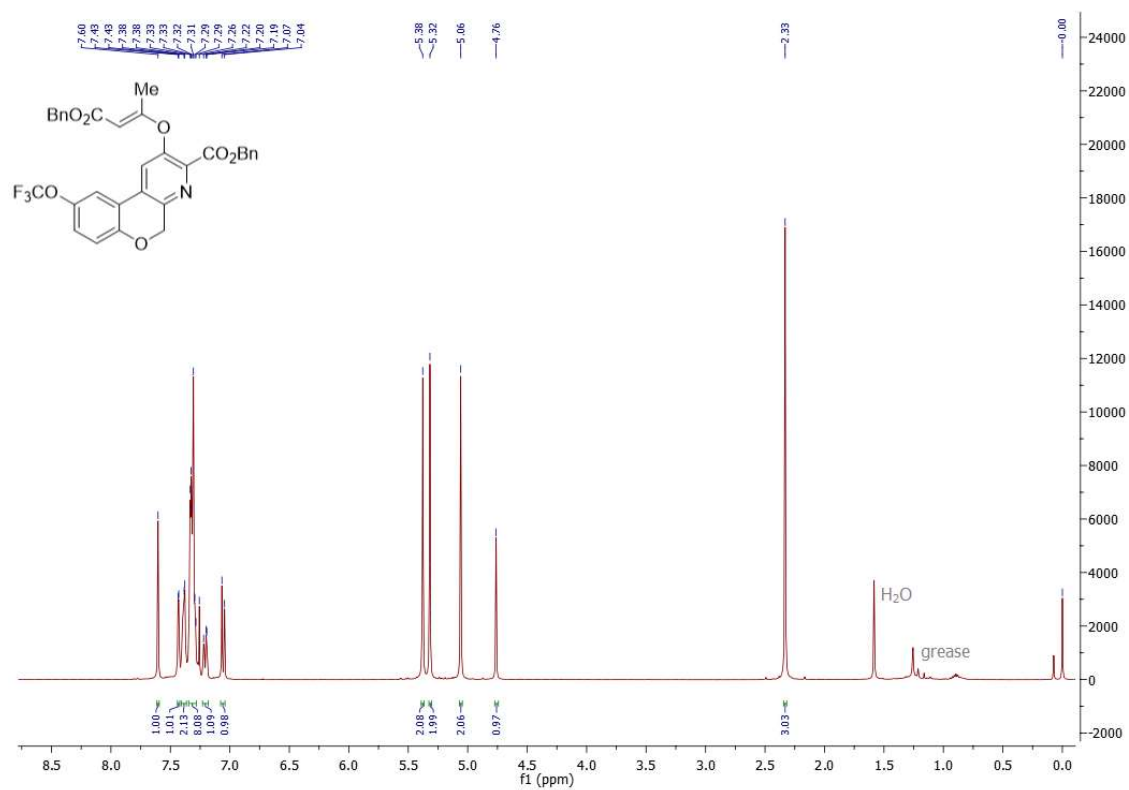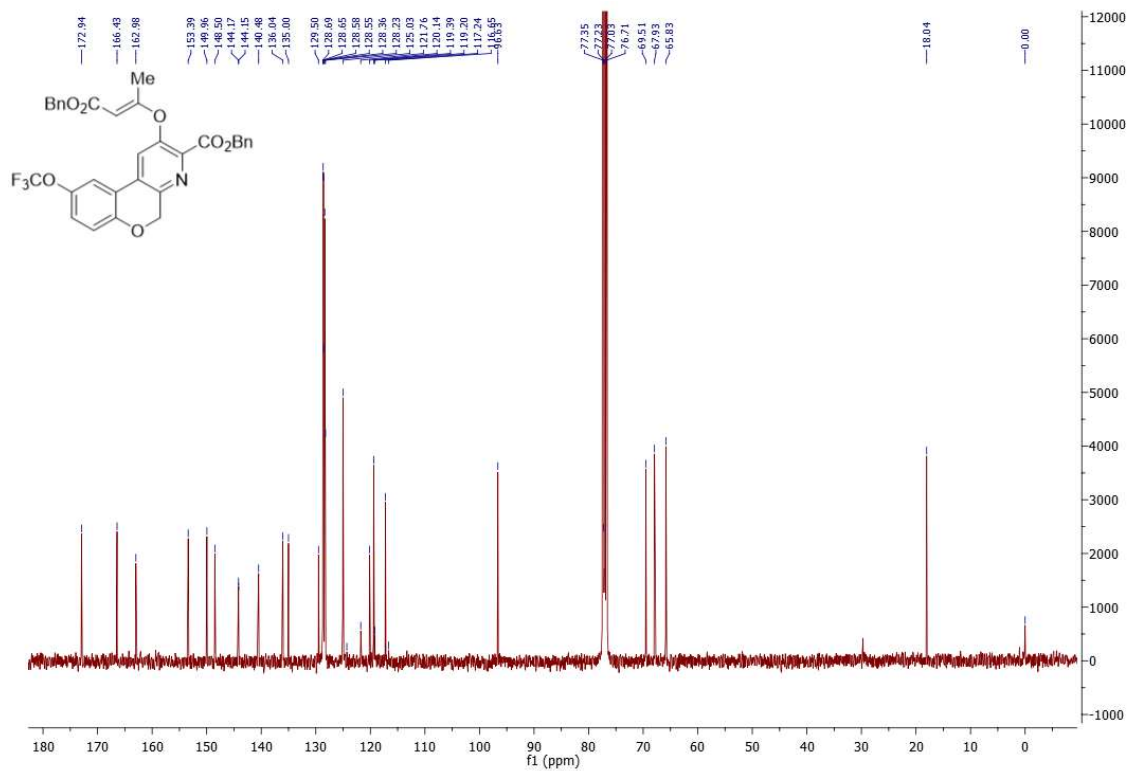

**Figure S11a:** <sup>1</sup>H and <sup>13</sup>C spectra of compound 3h (CDCl<sub>3</sub>).

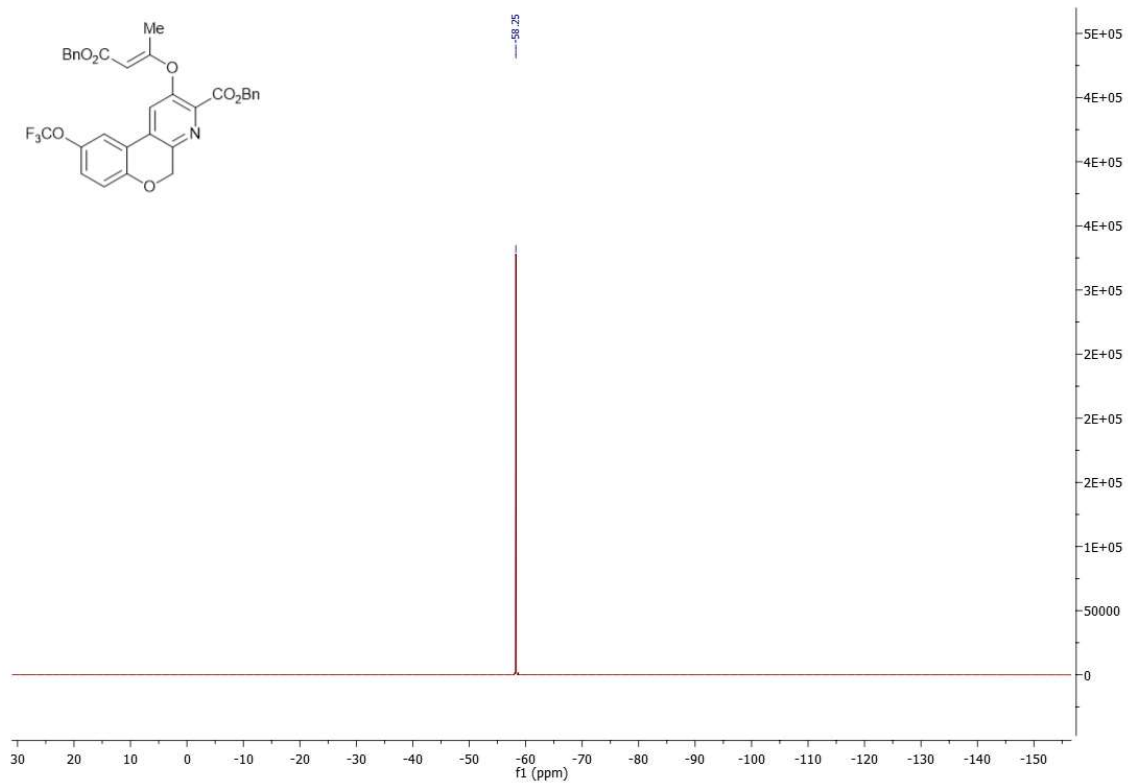

**Figure S11b:**  $^{19}\text{F}$  NMR spectrum of compound **3h** ( $\text{CDCl}_3$ ).

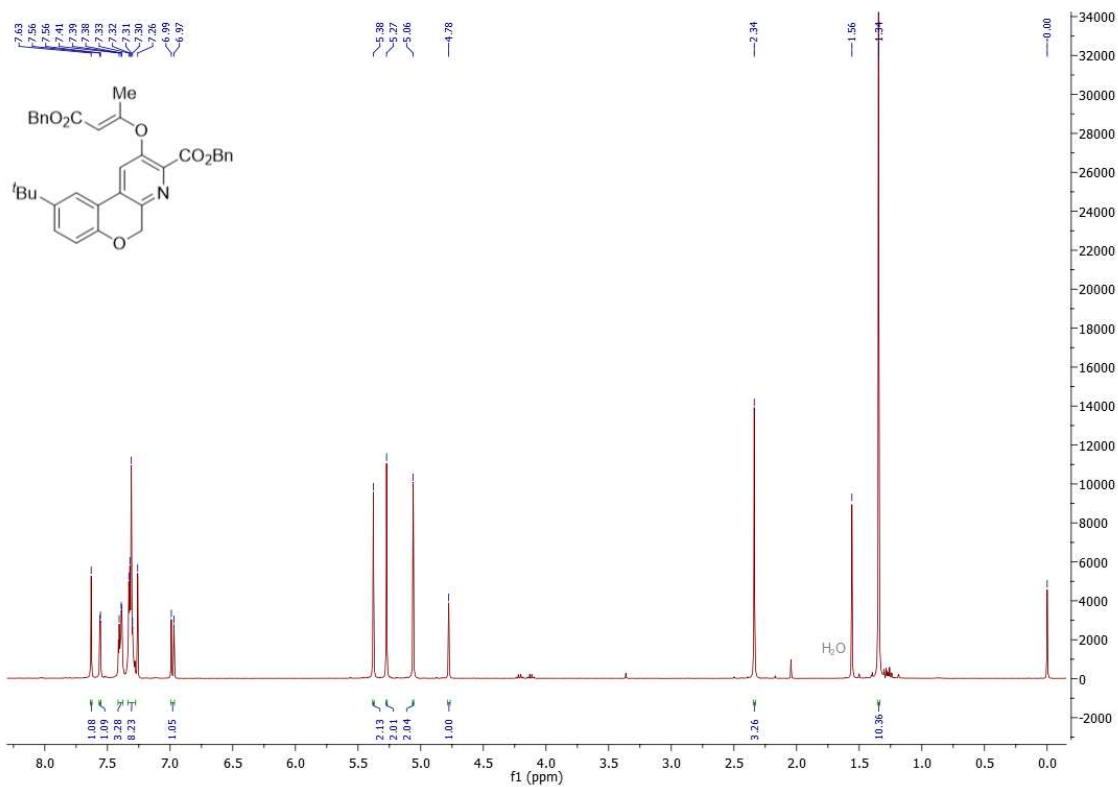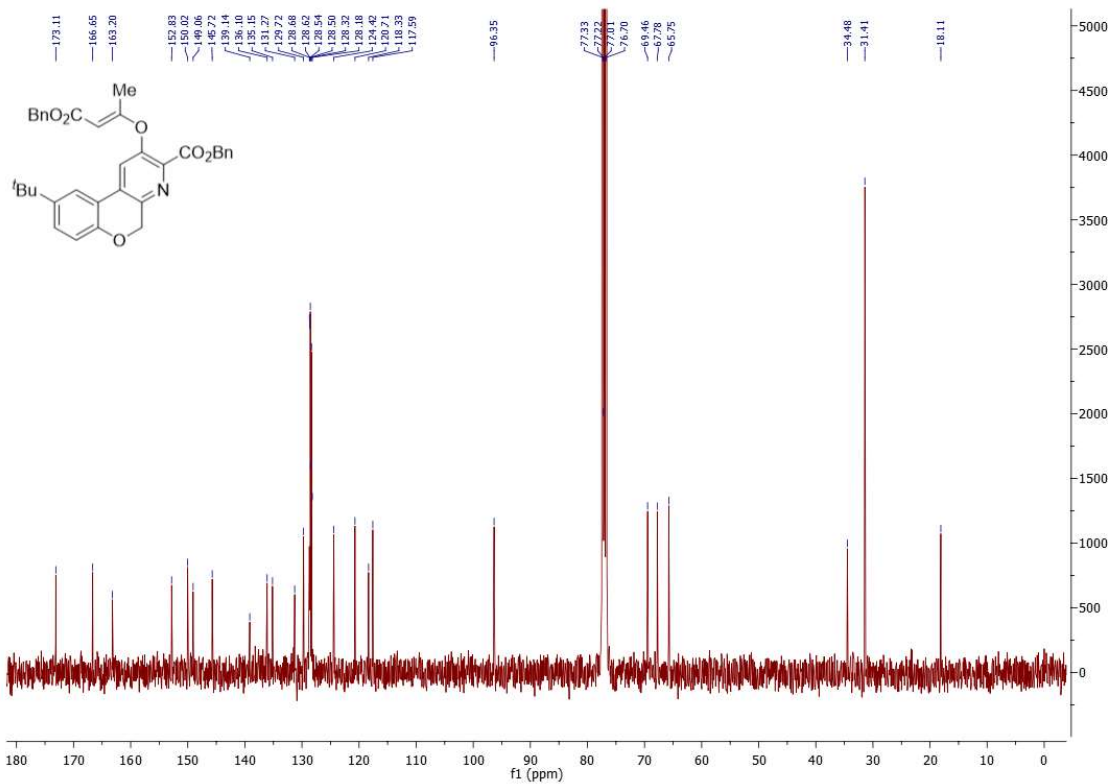

Figure S12: <sup>1</sup>H and <sup>13</sup>C NMR spectra of compound 3i (CDCl<sub>3</sub>).

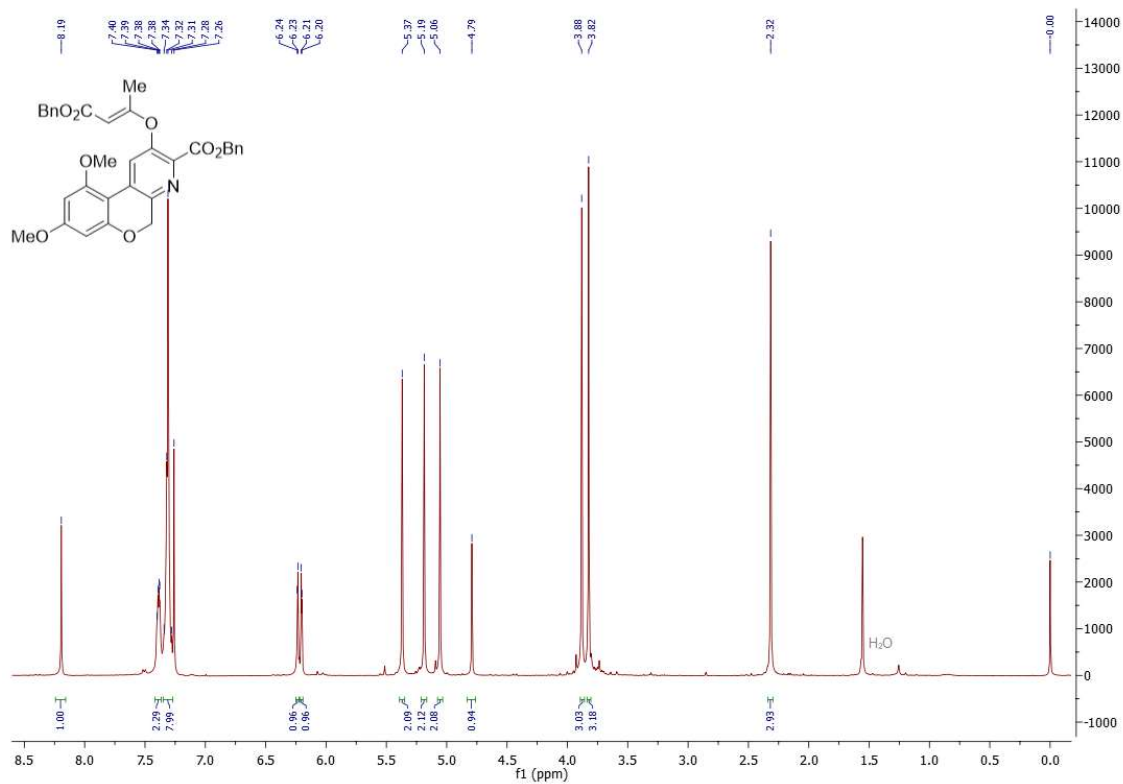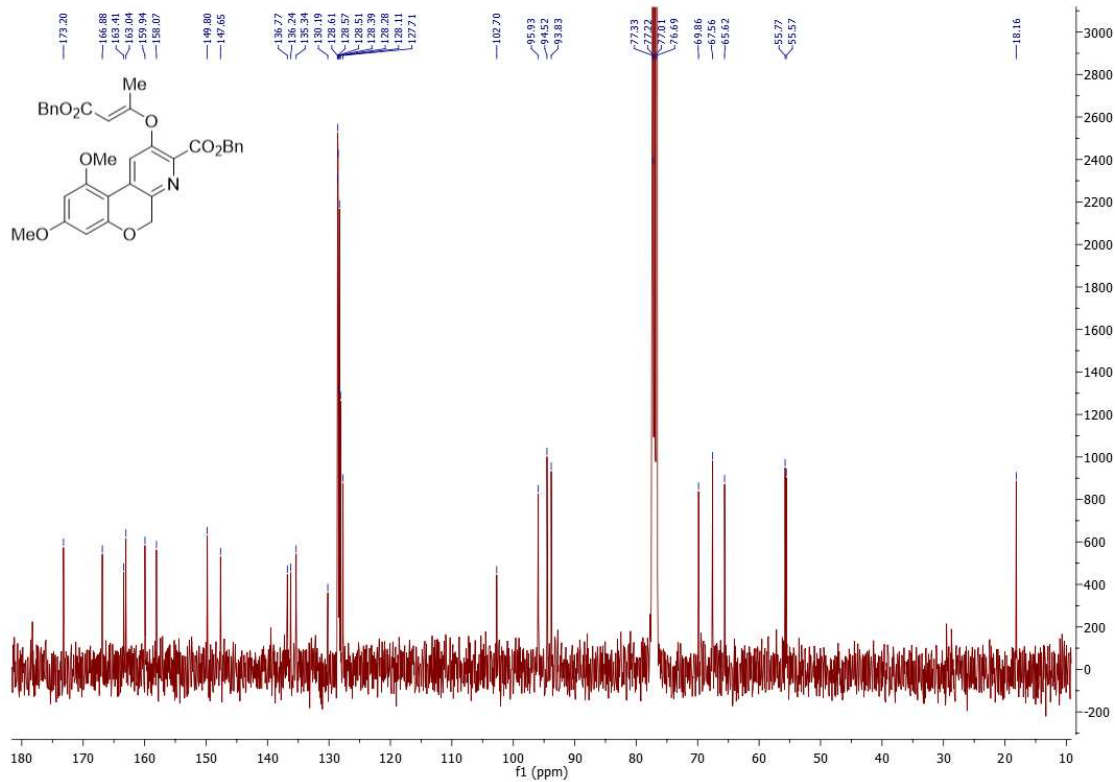

Figure S13: <sup>1</sup>H and <sup>13</sup>C NMR spectra of compound **3j** (CDCl<sub>3</sub>).



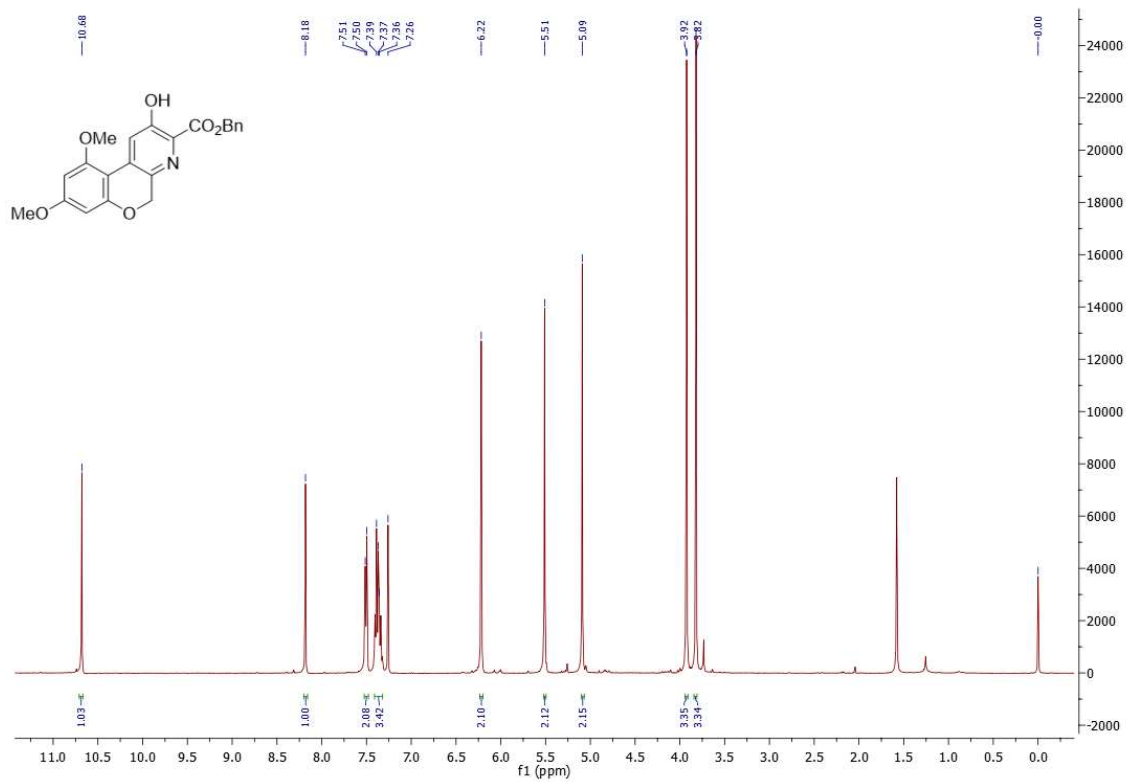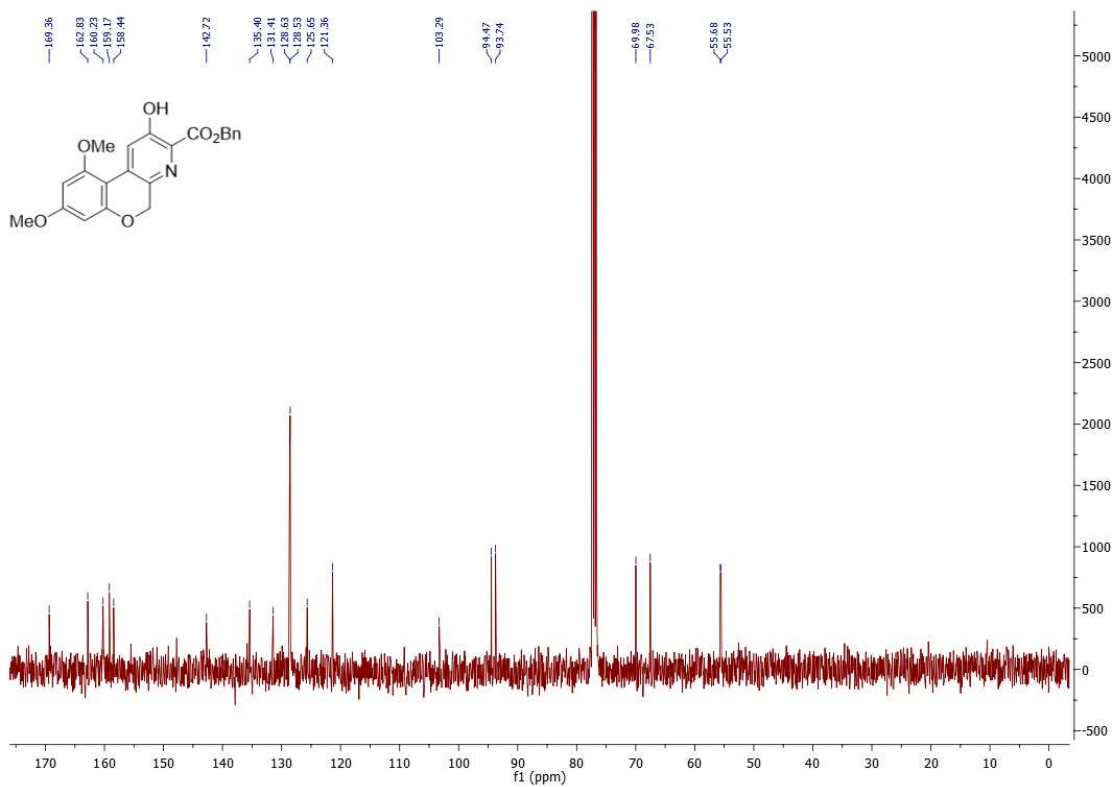

Figure S14:  $^1\text{H}$  and  $^{13}\text{C}$  NMR spectra of compound 4 ( $\text{CDCl}_3$ ).

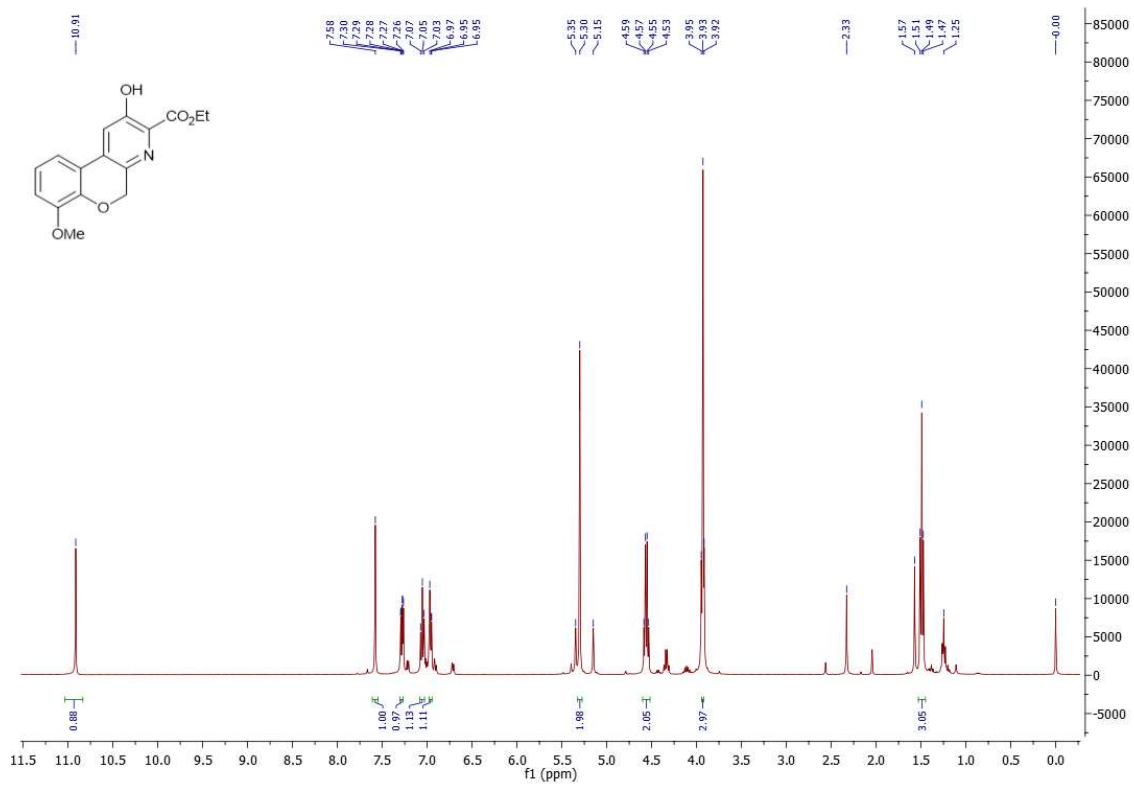

**Figure S15:** <sup>1</sup>H NMR spectrum of compound **6** (CDCl<sub>3</sub>).

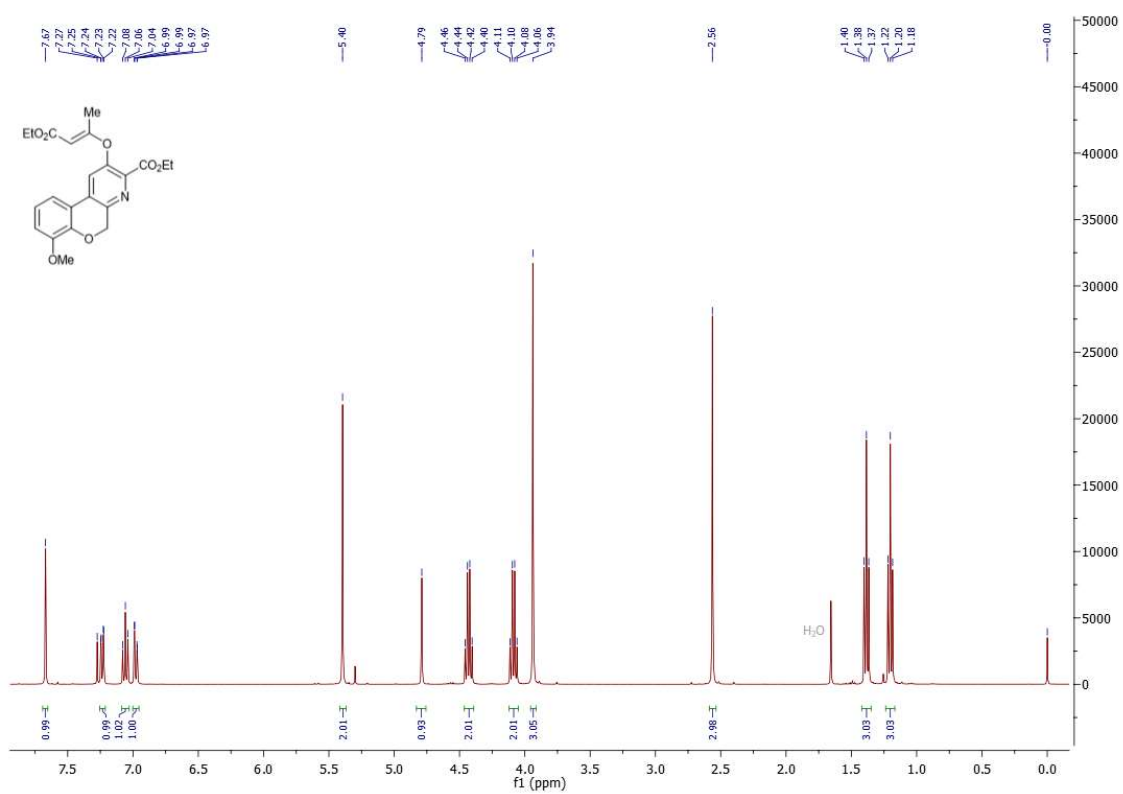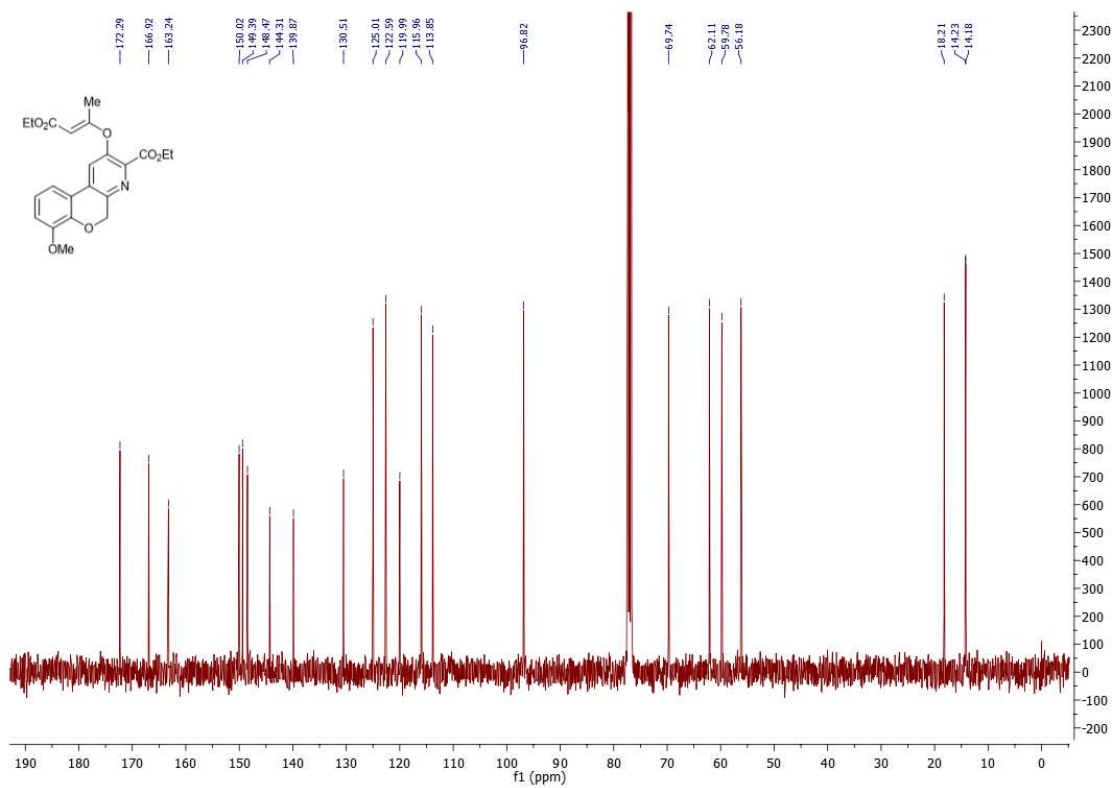

Figure S16a: <sup>1</sup>H and <sup>13</sup>C NMR spectra of compound 7 (CDCl<sub>3</sub>).

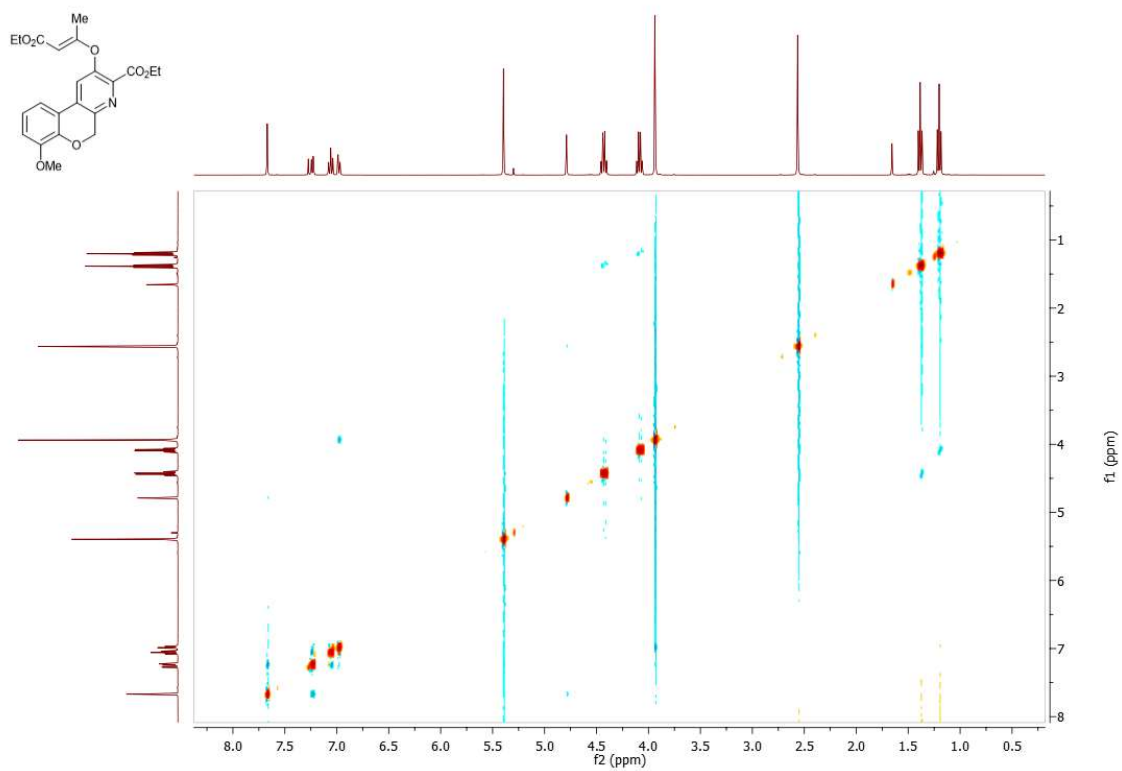

**Figure S16b:** NOESY spectrum of compound 7 ( $\text{CDCl}_3$ ).

## Crystallographic Data for Compounds 3b and 4

**Table S1:** Crystallographic data and details about refinement for structures **3b** and **4**.

|                                                | <b>Compound 3b</b>                               | <b>Compound 4</b>                                |
|------------------------------------------------|--------------------------------------------------|--------------------------------------------------|
| Formula                                        | C <sub>33</sub> H <sub>29</sub> N O <sub>7</sub> | C <sub>22</sub> H <sub>19</sub> N O <sub>6</sub> |
| <i>M</i>                                       | 551.57                                           | 393.38                                           |
| $\lambda$ (Å)                                  | 0.71073                                          | 0.71073                                          |
| <i>T</i> (K)                                   | 296 (2)                                          | 296(2)                                           |
| crystal system                                 | Triclinic                                        | Triclinic                                        |
| space group                                    | <i>P</i> -1                                      | <i>P</i> -1                                      |
| <i>a</i> (Å)                                   | 10.646(2)                                        | 8.708(2)                                         |
| <i>b</i> (Å)                                   | 11.634(3)                                        | 13.624(4)                                        |
| <i>c</i> (Å)                                   | 12.087(3)                                        | 17.004(5)                                        |
| $\alpha$ (°)                                   | 101.823(13)                                      | 66.753(6)                                        |
| $\beta$ (°)                                    | 109.747(10)                                      | 79.781(7)                                        |
| $\gamma$ (°)                                   | 91.715(13)                                       | 88.762(7)                                        |
| <i>V</i> (Å <sup>3</sup> )                     | 1371.0(6)                                        | 1821.5(9)                                        |
| <i>Z</i>                                       | 2                                                | 4                                                |
| $\rho_{calc}$ (g.cm <sup>-3</sup> )            | 1.336                                            | 1.434                                            |
| $\mu$ (mm <sup>-1</sup> )                      | 0.094                                            | 0.105                                            |
| Crystal size                                   | 0.20 x 0.20 x 0.12                               | 0.60 x 0.20 x 0.20                               |
| Crystal colour                                 | Yellow                                           | Yellow                                           |
| Crystal description                            | Block                                            | Prism                                            |
| $\theta_{max}$ (°)                             | 26.357                                           | 25.350                                           |
| total data                                     | 33320                                            | 64553                                            |
| unique data                                    | 5500                                             | 6676                                             |
| <i>R</i> <sub>int</sub>                        | 0.1499                                           | 0.2185                                           |
| <i>R</i> [ <i>I</i> > 2 $\sigma$ ( <i>I</i> )] | 0.0422                                           | 0.0946                                           |
| <i>R</i> <sub>w</sub>                          | 0.0985                                           | 0.1675                                           |
| Goodness of fit                                | 1.028                                            | 1.025                                            |
| $\rho_{min}$                                   | -0.655                                           | -0.284                                           |
| $\rho_{max}$                                   | 0.184                                            | 0.259                                            |

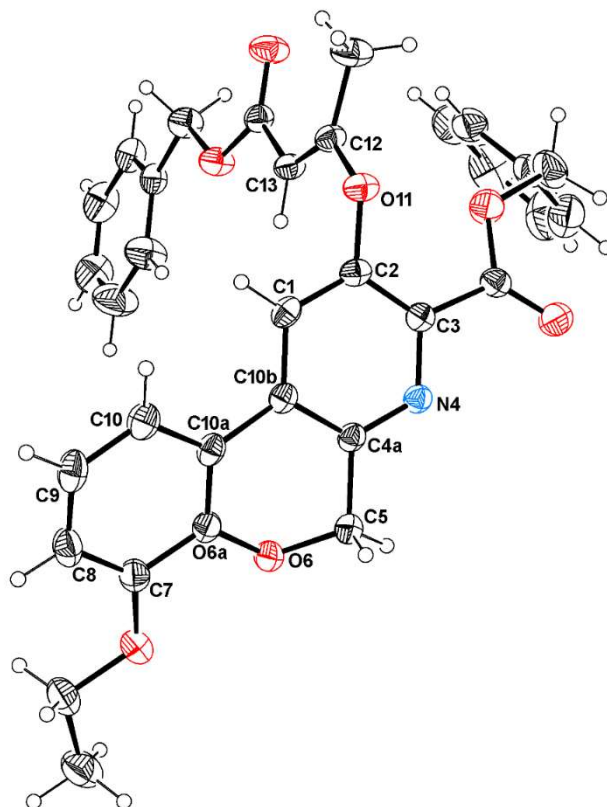

**Figure S17.** ORTEP-3 representation of compound **3b**, using 30% probability level ellipsoids (CCDC 2079932).

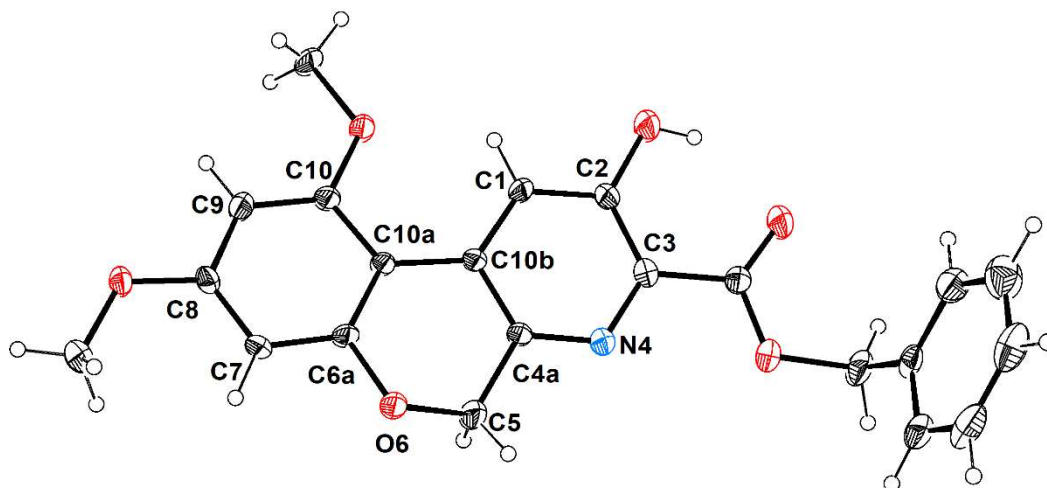

**Figure S18.** ORTEP-3 representation of compound **4**, using 30% probability level ellipsoids (CCDC 2079933).

## Study of the Reaction Mechanism via Mass Spectrometry Analysis

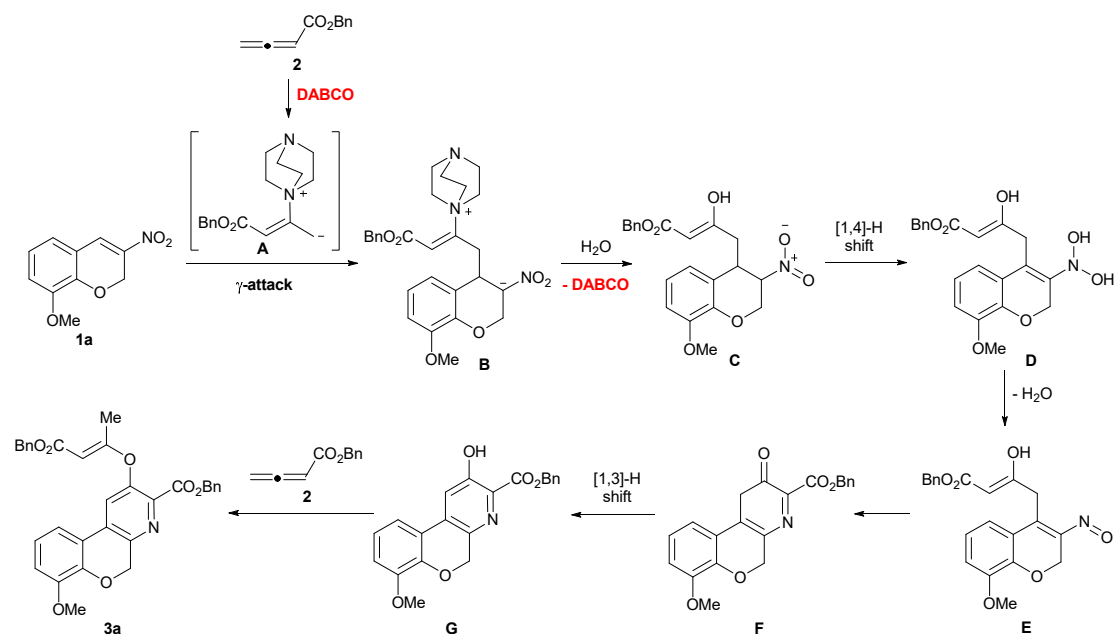

**Scheme S1.** Proposed mechanism for the synthesis of 5H-chromeno[3,4-b]pyridines.

**Table S2.** Characterization of allene **2**, intermediates and final product **3a** by HRMS.

| Compound             |                                                               |               | HRMS results     |                                                               |            |              |
|----------------------|---------------------------------------------------------------|---------------|------------------|---------------------------------------------------------------|------------|--------------|
| Number/<br>Reference | Formula                                                       | Exact<br>mass | Accurate<br>mass | Ion<br>formula                                                | Exact mass | Err<br>(ppm) |
| <b>2</b>             | C <sub>11</sub> H <sub>10</sub> O <sub>2</sub>                | 174.0681      | 175.0767         | C <sub>11</sub> H <sub>11</sub> O <sub>2</sub>                | 175.0765   | -1.1         |
| <b>A</b>             | C <sub>17</sub> H <sub>22</sub> N <sub>2</sub> O <sub>2</sub> | 286.1681      | 287.1764         | C <sub>17</sub> H <sub>23</sub> N <sub>2</sub> O <sub>2</sub> | 287.1754   | -3.3         |
| <b>B</b>             | C <sub>27</sub> H <sub>31</sub> N <sub>3</sub> O <sub>6</sub> | 493.2213      | 494.2300         | C <sub>27</sub> H <sub>32</sub> N <sub>3</sub> O <sub>6</sub> | 494.2286   | -2.8         |
| <b>C/D</b>           | C <sub>21</sub> H <sub>21</sub> NO <sub>7</sub>               | 399.1318      | 398.1243         | C <sub>21</sub> H <sub>20</sub> NO <sub>7</sub>               | 398.1245   | +0.5         |
| <b>E</b>             | C <sub>21</sub> H <sub>19</sub> NO <sub>6</sub>               | 381.1212      | 380.1136         | C <sub>21</sub> H <sub>18</sub> NO <sub>6</sub>               | 380.1140   | +0.9         |
| <b>F/G</b>           | C <sub>21</sub> H <sub>17</sub> NO <sub>5</sub>               | 363.1108      | 362.1046         | C <sub>21</sub> H <sub>16</sub> NO <sub>5</sub>               | 362.1034   | -3.3         |
| <b>3a</b>            | C <sub>32</sub> H <sub>27</sub> NO <sub>7</sub>               | 537.1788      | 576.1439         | C <sub>32</sub> H <sub>27</sub> KNO <sub>7</sub>              | 576.1419   | -3.4         |

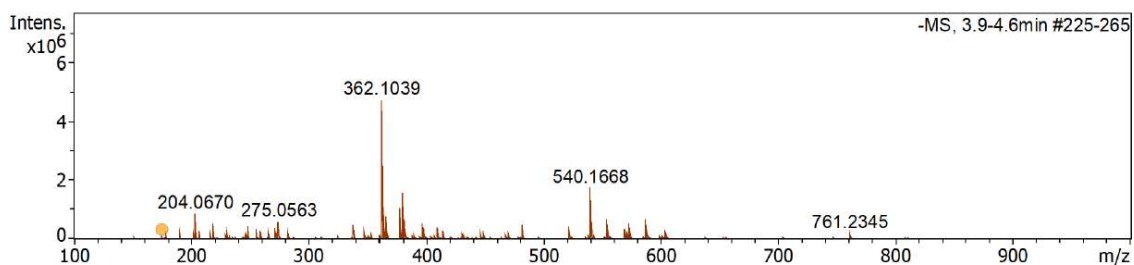

**Figure S19.** ESI(-)/HRMS spectrum of allene **2**.

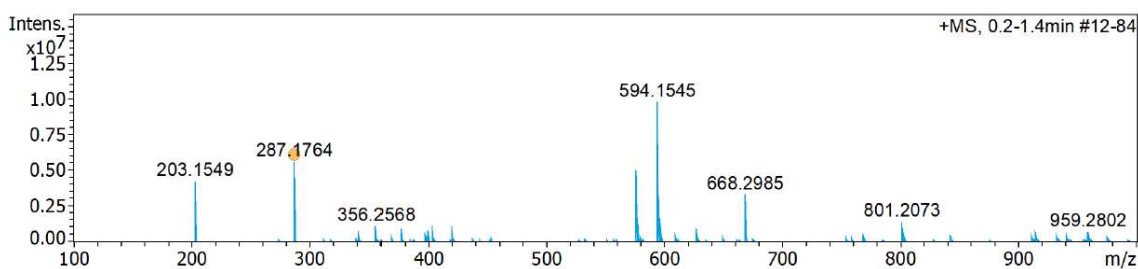

**Figure S20.** ESI(+)/HRMS spectrum of intermediate **A**.

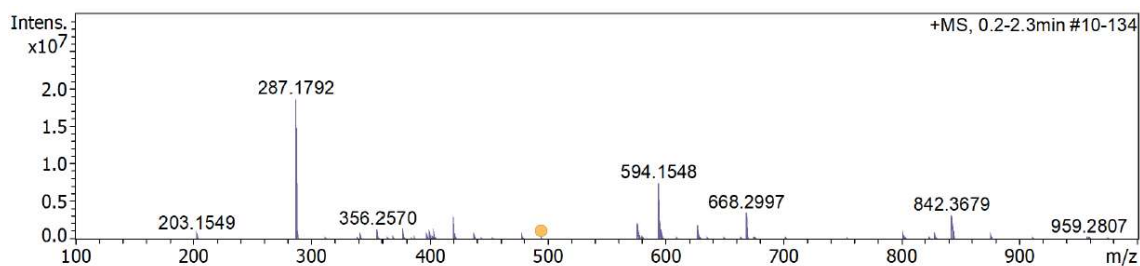

**Figure S21.** ESI(+)/HRMS spectrum of intermediate **B**.

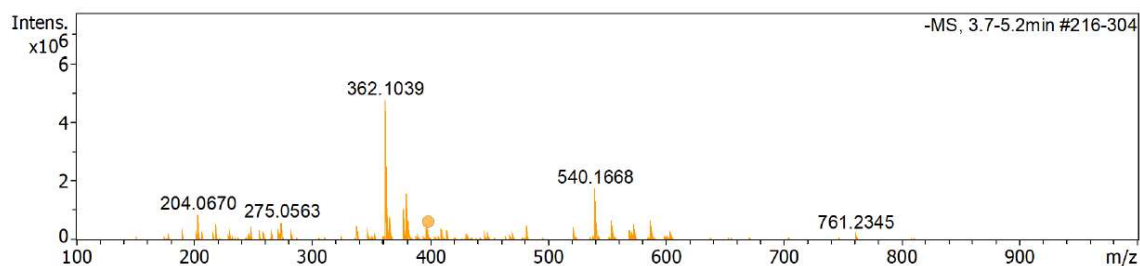

**Figure S22.** ESI(-)/HRMS spectrum of intermediate **C/D**.



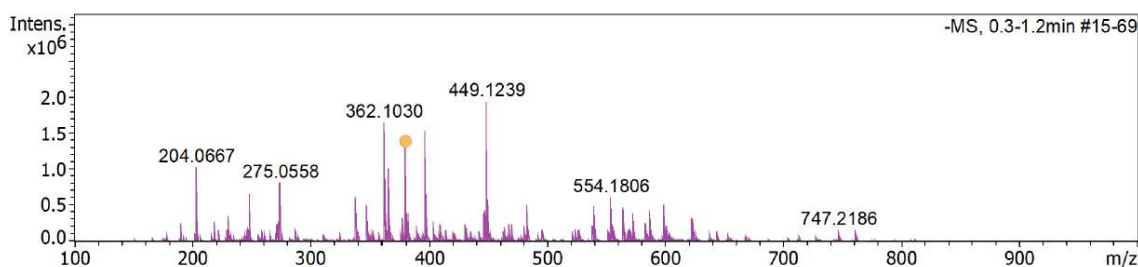

**Figure S23.** ESI(-)/HRMS spectrum of intermediate **E**.

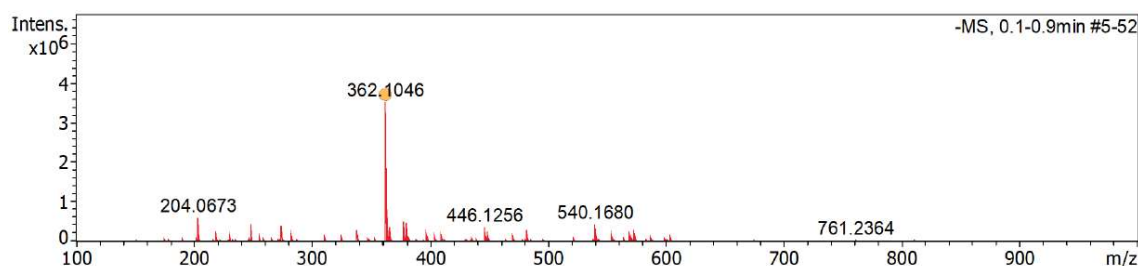

**Figure S24.** ESI(-)/HRMS spectrum of intermediate **F/G**.

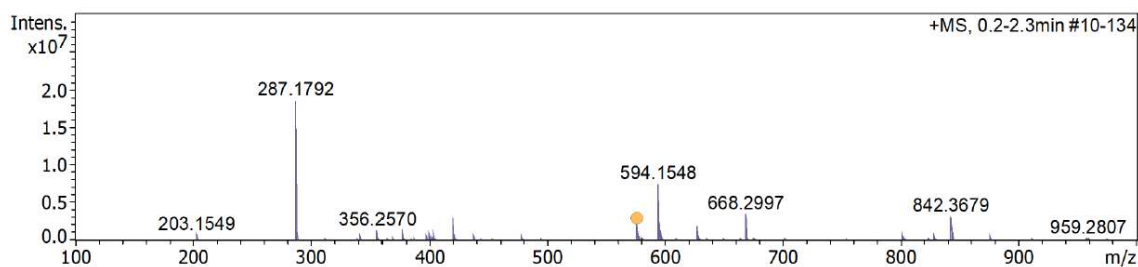

**Figure S25.** ESI(+)/HRMS spectrum of **3a**.

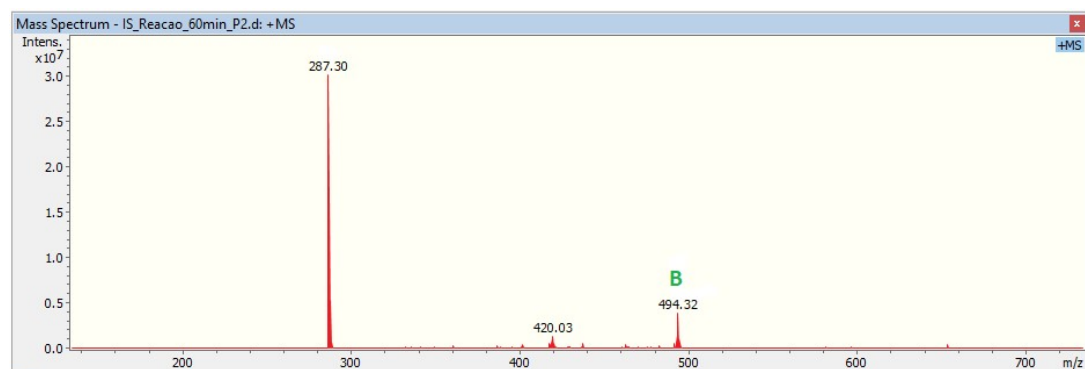

**Figure S26.** Full scan mass spectrum obtained in the ESI positive mode for the reactional mixture, at 60 min. The peak at  $m/z$  494 was assigned to the protonated molecule of intermediate **B**. This precursor ion was isolated in the QIT mass analyser and CID experiments were done in order to obtain the  $MS^2$  spectrum.

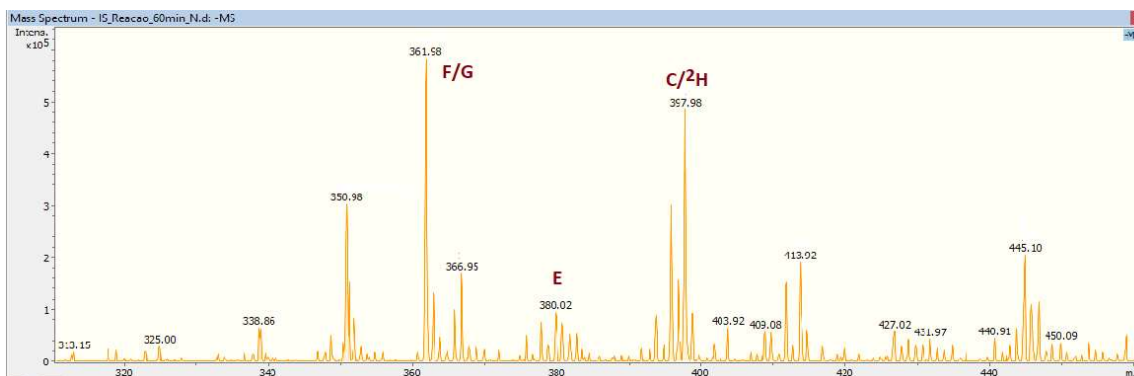

**Figure S27.** Full scan mass spectrum obtained in the ESI negative mode for the reactional mixture, at 60 min. The peaks at  $m/z$  398, 380 and 362 were assigned to the deprotonated molecules of intermediates **C/D**, **E** and **F/G**, respectively. These precursor ions were isolated in the QIT analyser and CID experiments were performed in order to obtain the  $MS^2$  spectra.

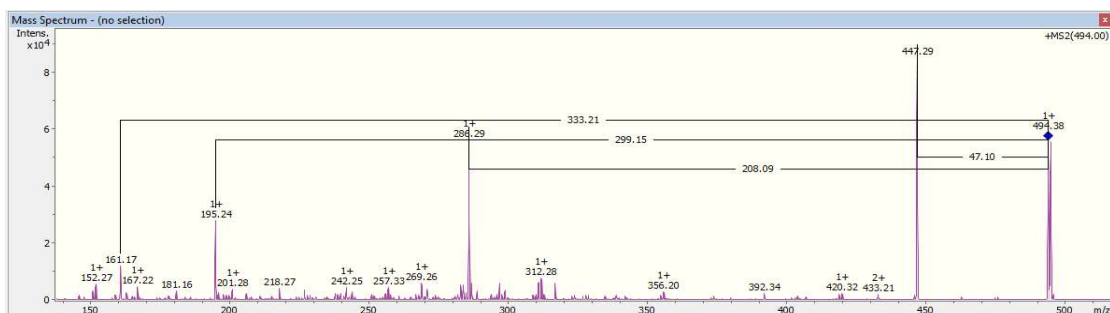

**Figure S28.** ESI(+)/ $MS^2$  spectrum of precursor ion  $m/z$  494.

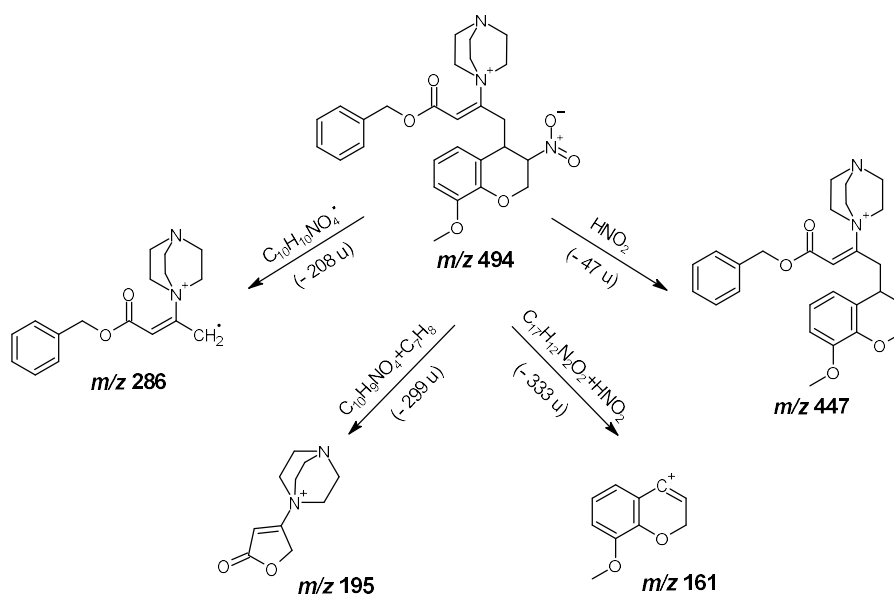

**Figure S29.** Proposed fragmentation patterns for the protonated molecule  $m/z$  494 of intermediate **B**.

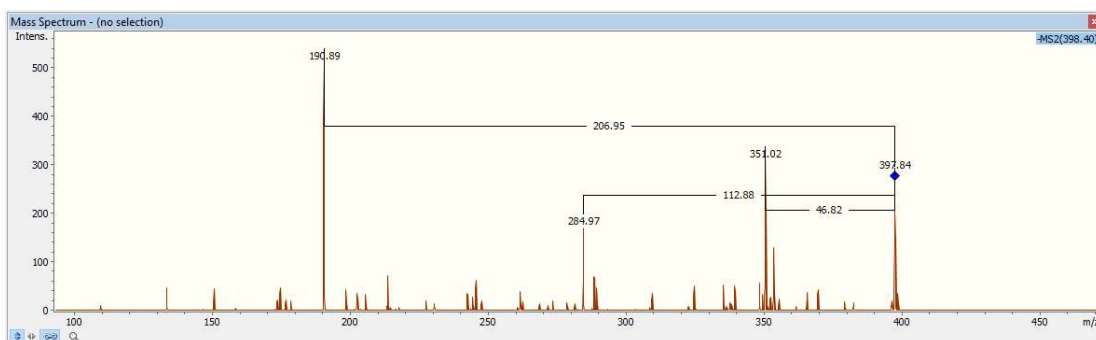

**Figure S30.** ESI(-)/MS<sup>2</sup> spectrum of precursor ion *m/z* 398.

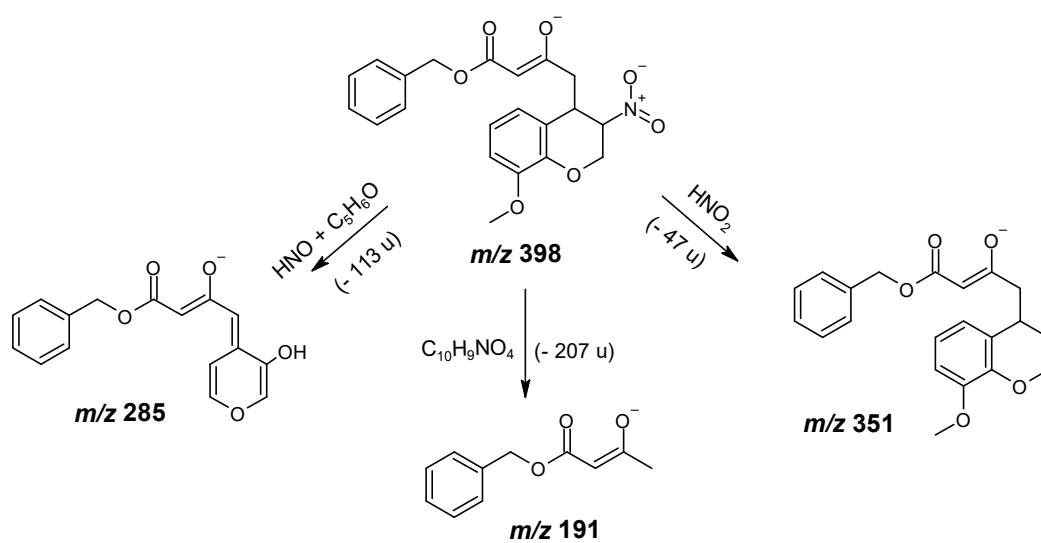

**Figure S31.** Proposed fragmentation patterns for the deprotonated molecule *m/z* 398 of intermediates C/D.

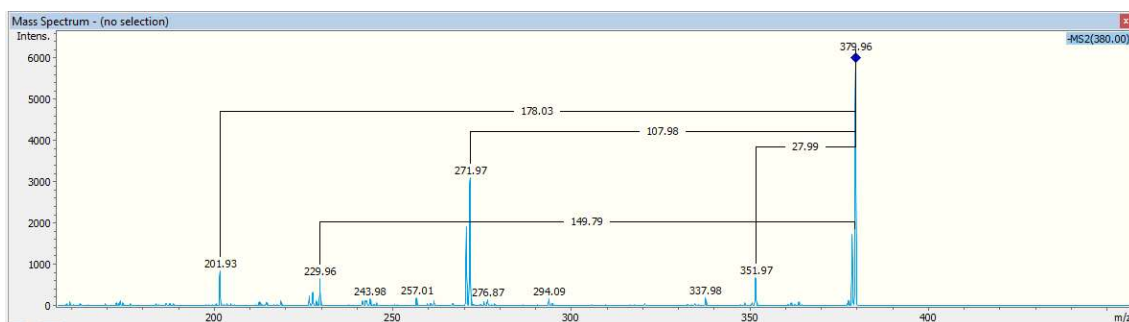

**Figure S32.** ESI(-)/MS<sup>2</sup> spectrum of precursor ion *m/z* 380.

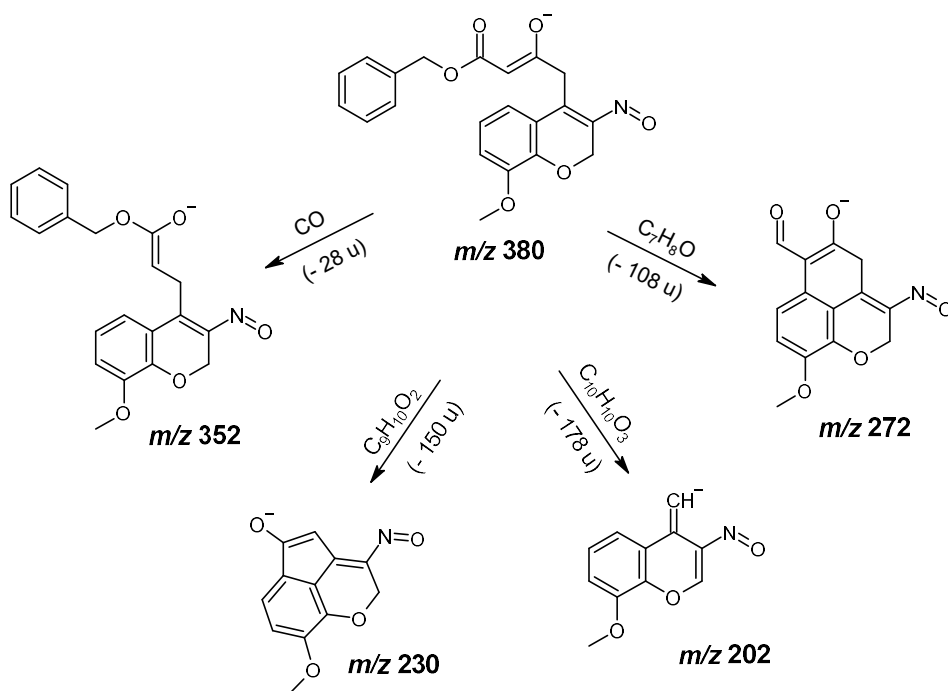

**Figure S33.** Proposed fragmentation patterns for the deprotonated molecule  $m/z\ 380$  of intermediate **E**.

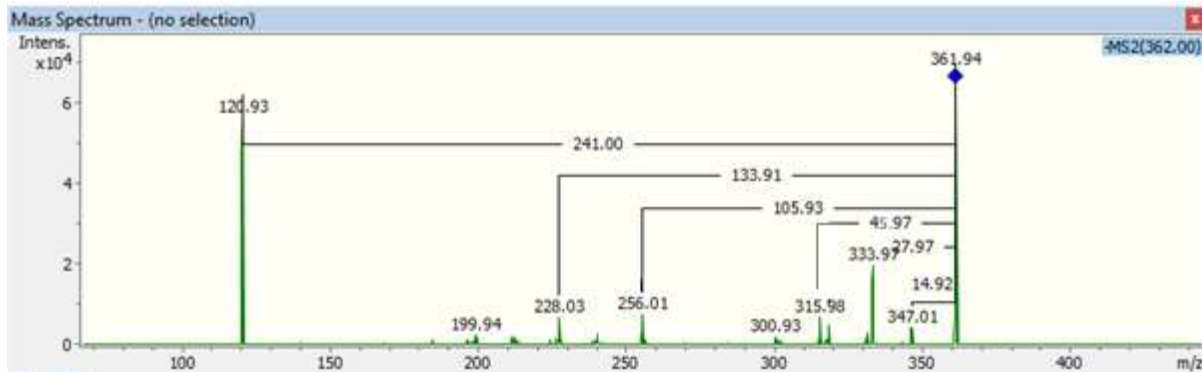

**Figure S34.** ESI(-)/MS<sup>2</sup> spectrum of precursor ion  $m/z\ 362$ .

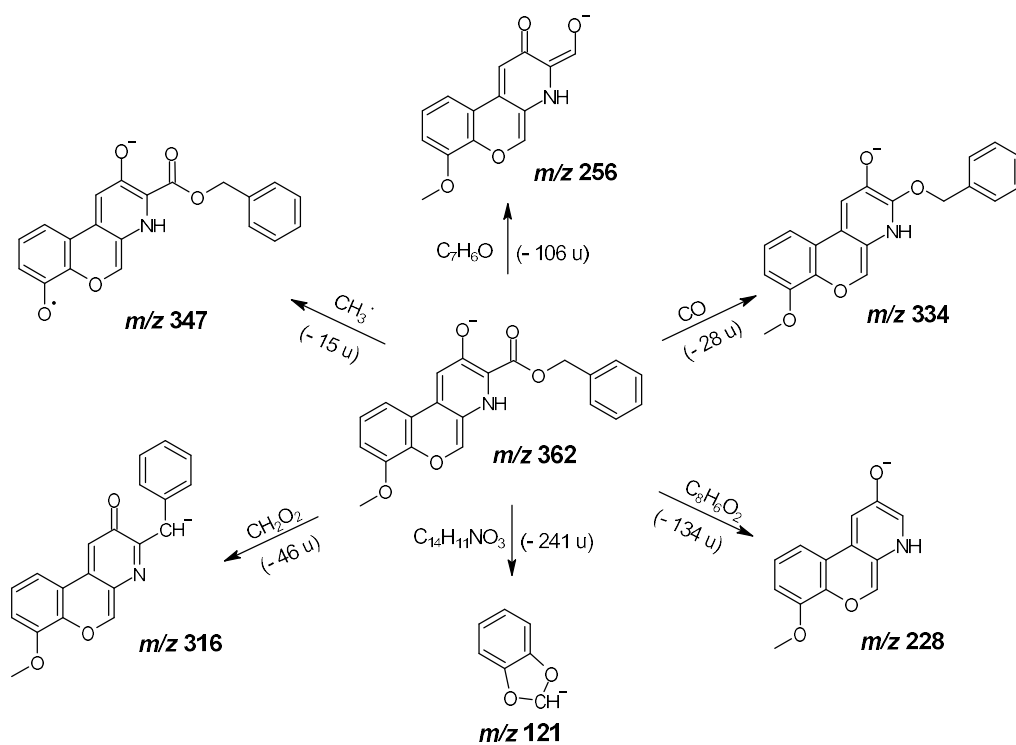

**Figure S35.** Proposed fragmentation patterns for the deprotonated molecule  $m/z$  362 of intermediates **F/G**.
